1 **Phospholipid peroxidation fuels ExoU phospholipase-dependent cell necrosis**  
2 **and supports *Pseudomonas aeruginosa*-driven pathology**

3 Salimata Bagayoko<sup>1</sup>, Stephen Leon Icaza<sup>1§</sup>, Miriam Pinilla<sup>1§</sup>, Audrey Hessel<sup>1§</sup>, Karin  
4 Santoni<sup>1</sup>, Pierre-Jean Bordignon<sup>1</sup>, Flavie Moreau<sup>1,2</sup>, Elif Eren<sup>1</sup>, Aurélien Boyancé<sup>1</sup>,  
5 Emmanuelle Naser<sup>1,3</sup>, Lise Lefèvre<sup>4</sup>, Céline Berrone<sup>1,2</sup>, Nino Iakobachvili<sup>8</sup>, Arnaud  
6 Metais<sup>1</sup>, Yoann Rombouts<sup>1</sup>, Agnès Coste<sup>4</sup>, Ina Attrée<sup>5</sup>, Dara W. Frank<sup>6</sup>, Hans  
7 Clevers<sup>7</sup>, Peter J. Peters<sup>8</sup>, Céline Cougoule<sup>1</sup>, Rémi Planès<sup>1#</sup> & Etienne Meunier<sup>1#</sup>

8

9 <sup>1</sup> Institute of Pharmacology and Structural Biology (IPBS), University of Toulouse,  
10 CNRS, Toulouse; France

11 <sup>2</sup> Level 3 Biosafety Animal Core facility, Anexplo platform, Institute of Pharmacology  
12 and Structural Biology (IPBS), University of Toulouse, CNRS, Toulouse; France

13 <sup>3</sup> Cytometry & Imaging Core facility, Institute of Pharmacology and Structural Biology  
14 (IPBS), University of Toulouse, CNRS, Toulouse; France

15 <sup>4</sup> RESTORE institute, University of Toulouse, CNRS, Toulouse; France

16 <sup>5</sup> Univ. Grenoble Alpes, CNRS, CEA, IBS, Bacterial Pathogenesis and Cellular  
17 Responses, F-38000 Grenoble

18 <sup>6</sup> Department of Microbiology and Immunology, Medical College of Wisconsin,  
19 Milwaukee, WI, 53226; USA

20 <sup>7</sup> Oncode Institute, Hubrecht Institute, Royal Netherlands Academy of Arts and  
21 Sciences and University Medical Center, Utrecht, Netherlands

22 <sup>8</sup> Division of Nanoscopy, Maastricht Multimodal Molecular Imaging Institute,  
23 Maastricht University, The Netherlands

24

25 § These authors contributed equally

26 # Address correspondence to: [etienne.meunier@ipbs.fr](mailto:etienne.meunier@ipbs.fr) (EM) & [remi.planes@ipbs.fr](mailto:remi.planes@ipbs.fr)  
27 (RP)

28 Lead contact: [etienne.meunier@ipbs.fr](mailto:etienne.meunier@ipbs.fr) (EM)

29

30 Present Address: Institute of Pharmacology and Structural Biology (IPBS), 205 Route  
31 de Narbonne, CNRS, 31000 Toulouse; France

32

33 **Summary**

34 Regulated cell necrosis supports immune and anti-infectious strategies of the body;  
35 however, dysregulation of these processes drives pathological organ damage.  
36 *Pseudomonas aeruginosa* expresses a phospholipase, ExoU that triggers  
37 pathological host cell necrosis through a poorly characterized pathway. Here, we  
38 investigated the molecular and cellular mechanisms of ExoU-mediated necrosis. We  
39 show that cellular peroxidised phospholipids enhance ExoU phospholipase activity,  
40 which drives necrosis of immune and non-immune cells. Conversely, both the  
41 endogenous lipid peroxidation regulator GPX4 and the pharmacological inhibition of  
42 lipid peroxidation delay ExoU-dependent cell necrosis and improve bacterial  
43 elimination *in vitro* and *in vivo*. Our findings also pertain to the ExoU-related  
44 phospholipase from the bacterial pathogen *Burkholderia thailandensis*, suggesting  
45 that exploitation of peroxidised phospholipids might be a conserved virulence  
46 mechanism among various microbial phospholipases. Overall, our results identify an  
47 original lipid peroxidation-based virulence mechanism as a strong contributor of  
48 microbial phospholipase-driven pathology.

49

50 Key words: lipid peroxidation, microbial phospholipases, cell necrosis, *Pseudomonas*  
51 *aeruginosa*

52

53

54

55

56

57

58

59

60

61

## 62 Introduction

63 Regulated cell necrosis (RCNs) drives physiological and immune processes, yet  
64 dysregulation of this process promotes pathological responses such as organ-failure  
65 and sepsis (Bedoui et al., 2020; Galluzzi et al., 2018; Place et al., 2021; Tang et al.,  
66 2020). Mechanistically, oxygen-dependent cell death is an evolutionary conserved  
67 process that involves the production of reactive oxygen species (ROS), transition  
68 metals (e.g. iron) and peroxidised lipid accumulation (Bogacz and Krauth-Siegel,  
69 2018; Conrad et al., 2018; Dixon et al., 2012; Jenkins et al., 2020). In addition to cell  
70 necrosis, lipid peroxidation broadly involves cellular processes essential to mediate  
71 optimal efferocytosis of dead cells, cellular communication resulting from the  
72 formation of lipids derived from peroxidised phospholipids (e.g. isoprostanes, platelet  
73 activating factor) or the production of bioactive lipids (eicosanoids) from arachidonic  
74 acid (Bochkov et al., 2010; Tyurina et al., 2019). In addition, the peroxidation of the  
75 mitochondrial phospholipid cardiolipin initiates apoptosis while the accumulation of  
76 peroxidised phosphatidyl ethanolamines (PE) promote the cellular necrosis,  
77 ferroptosis (Bersuker et al., 2019; Conrad and Pratt, 2019; Doll et al., 2017, 2019;  
78 Kagan et al., 2017; Wiernicki et al., 2020; Yang et al., 2016). Specifically, the  
79 dysregulation of lipid peroxidation processes is associated with various human  
80 pathologies such as cancer chemoresistance, brain and ischemia injuries,  
81 neurological alterations, metabolic diseases as well as tuberculosis susceptibility  
82 (Amaral et al., 2019; Dar et al., 2018; Li et al., 2020; Meunier and Neyrolles, 2019;  
83 Stockwell et al., 2020; Zhu et al., 2019). In this context, the enzymes glutathione  
84 peroxidase 4 (GPX4) and ferroptosis-suppressor protein-1 (FSP1) that belongs to the  
85 CoQ antioxidant system, detoxify phospholipid hydroperoxide accumulation, hence  
86 allowing lipid peroxide amounts to be balanced in cells (Bersuker et al., 2019; Dixon  
87 et al., 2012; Doll et al., 2019; Friedmann Angeli et al., 2014; Yang et al., 2016). On  
88 the contrary, iron excess, lipoxygenase activity or cytochrome P450 oxidoreductase  
89 (CYPOR) all promote phospholipid peroxidation, which can end with ferroptosis  
90 induction in the absence of proper regulation (Dixon et al., 2012; Doll et al., 2017;  
91 Kagan et al., 2017; Yan1 et al., 2020; Yang et al., 2016; Zou et al., 2020).

92 In this regard, the bacterial pathogen *Pseudomonas aeruginosa* (*P. aeruginosa*)  
93 expresses ExoU, an A2 phospholipase from the patatin family, that triggers a  
94 necrosis-dependent pathology through a poorly understood pathway (Anderson et

95 al., 2015; Dessen, 2000; Diaz and Hauser, 2010; Gendrin et al., 2012; Howell et al.,  
96 2013; Phillips et al., 2003; Rabin and Hauser, 2003; Sato and Frank, 2004; Sitkiewicz  
97 et al., 2006; Wilson and Knoll, 2018). In presence of cellular co-factors such as  
98 ubiquitin (Anderson et al., 2015) or the trafficking chaperone DNAJC5 (Deruelle et al.,  
99 2020), ExoU activity rapidly cleaves at the sn-2 position of host membrane  
100 phospholipids, liberating large amounts of arachidonic acid that are then metabolized  
101 into eicosanoids by cellular enzymes cyclooxygenases, cytochrome P450 or  
102 lipoxygenases (Machado et al., 2011; Pazos et al., 2017; Saliba et al., 2005; Wilson  
103 and Knoll, 2018). Importantly, *in vivo*, ExoU expression by *P. aeruginosa* is  
104 associated with a robust production of oxidized lipids such the platelet activating  
105 factor (PAF) or isoprostanes (da Cunha et al., 2015; Machado et al., 2011). In this  
106 context, we explored the possibility that *P. aeruginosa* ExoU mediates a necrosis-  
107 dependent host pathology involving lipid peroxidation.

108

109

110

111

112

113

114

115

116

117

118

119

120

121

122

123 ***P. aeruginosa* infection triggers ExoU-dependent alarmin and peroxidised lipid**  
124 **production in mice**

125 *P. aeruginosa* ExoU is injected into cells by the Type-3 Secretion System (T3SS)  
126 (Gendrin et al., 2012; Rabin and Hauser, 2003), which triggers a fast and violent  
127 cellular necrosis. Therefore, we first monitored the profile of ExoU-dependent  
128 pathology in mice infected with the clinical isolate pp34 *exoU*<sup>+</sup> or its isogenic mutant  
129 (*exoU*). Similar to previous studies (Howell et al., 2013; Al Moussawi and  
130 Kazmierczak, 2014; Phillips et al., 2003; Shaver and Hauser, 2004), intranasal  
131 instillation with either *exoU*<sup>+</sup> or *exoU* strains highlighted a *P. aeruginosa*-induced  
132 acute pathology mainly due to ExoU, as mice infected with *exoU* bacteria showed  
133 improved survival to infection (**Fig. 1A**). This observation was paralleled with lower  
134 bacterial loads of *P. aeruginosa* *exoU* than *exoU*<sup>+</sup> in the bronchoalveolar lavage  
135 fluids (BALFs), the lungs, the blood and the spleen, suggesting that ExoU also  
136 promotes bacterial dissemination (**Fig. 1B**). As *P. aeruginosa* triggers NLR4-,  
137 NLRP3- and Caspase-11-dependent inflammasome response (Balakrishnan et al.,  
138 2018; Bitto et al., 2018; Cohen and Prince, 2013; Eren et al., 2019; Faure et al.,  
139 2014; Franchi et al., 2007; Iannitti et al., 2016; Miao et al., 2008; Al Moussawi and  
140 Kazmierczak, 2014; Santos et al., 2018; Sutterwala et al., 2007), we infected  
141 inflammasome-deficient mice (*Casp1/Casp11*<sup>-/-</sup>, *Nlr4*<sup>-/-</sup> and *GasderminD*<sup>-/-</sup>) and  
142 observed that those mice were not protected against *P. aeruginosa* *exoU*<sup>+</sup>, hence  
143 suggesting that ExoU-promoted mouse pathology occurs independently from the  
144 inflammasome machineries (**Figs. S1A, B**). A hallmark of host cell necrosis is the  
145 release of intracellular mediators such as alarmins that contribute to the initiation and  
146 the development of an inflammatory reaction, which occurs upon *P. aeruginosa*  
147 infection (Aoyagi et al., 2017; Al Moussawi and Kazmierczak, 2014). Therefore, we  
148 primarily focused our analysis on alarmin release. We observed a strong ExoU-  
149 dependent alarmin production in BALFs 6 h after infection, such as IL-1 family  
150 alarmins IL1 $\alpha$ , IL-33 or IL-36 $\gamma$  (Yang et al., 2017) (**Fig.1C**). In addition, we also  
151 detected that *exoU*-expressing *P. aeruginosa* triggered a strong production of  
152 phospholipid- and arachidonic acid (aa)-derived mediators such as prostaglandin E2  
153 and leukotriene B4, which correlates with the robust phospholipase activity of ExoU  
154 (**Fig.1D**) (Machado et al., 2011; Pazos et al., 2017; Saliba et al., 2005). Importantly,  
155 BALFs of mice infected with *exoU*-expressing *P. aeruginosa* also exhibited a marked

156 presence of oxidized lipid (by)-products such as isoprostanes (8-iso PGF<sub>2</sub>α) or  
157 Malondialdehyde (MDA), which suggests that *exoU*-expressing *P. aeruginosa* also  
158 drives an exacerbated lipid oxidation response in mice (**Fig.1E**) (da Cunha et al.,  
159 2015; Saliba et al., 2006).

160

### 161 **Lipid peroxidation contributes to ExoU-induced cell necrosis and *P.*** 162 ***aeruginosa* escape from phagocyte-mediated killing**

163 The observation that *exoU*-expressing *P. aeruginosa* infection associates to a lipid  
164 peroxidation signature *in vivo*, encouraged us to determine the importance of lipid  
165 peroxidation on ExoU-induced cellular necrosis. As *P. aeruginosa* strains that do not  
166 express ExoU can promote an NLRC4 inflammasome response in macrophages  
167 (Sutterwala et al., 2007), we used mouse Bone-Marrow-Derived Macrophages  
168 (BMDMs) that lack *Nlrc4* expression to specifically address the importance of lipid  
169 peroxidation on ExoU-dependent cell necrosis. We infected *Nlrc4*<sup>-/-</sup> primary murine  
170 BMDMs with *P. aeruginosa* strains expressing or not expressing ExoU. The  
171 pharmacological inhibition of various regulated necrosis pathways (e.g. pyroptosis,  
172 necroptosis, apoptosis, parthanatos) showed that only ferrostatin-1, a potent and well  
173 characterized inhibitor of phospholipid peroxidation (Skouta et al., 2014), repressed  
174 ExoU-dependent cell necrosis (**Figs. 2A, S2A; Movies S1-S6**). In addition, ExoU-  
175 induced IL-1α and HMGB1 alarmin release in macrophages was reduced in presence  
176 of ferrostatin-1 whereas TNFα levels remained similar (**Fig. 2B**), suggesting that lipid  
177 peroxidation contributes to alarmin release in response to ExoU. We noticed that  
178 ExoU-triggered ferrostatin-1-sensitive necrosis was not restricted to murine BMDMs  
179 as primary human macrophages, the human U937 monocytic cell line, human and  
180 murine neutrophils and eosinophils, the human bronchial epithelial (HBEs), A549 or  
181 HELA epithelial cells were all sensitive to lipid peroxidation inhibition upon infection  
182 with *exoU*-expressing *P. aeruginosa* (**Fig. S2B**). ExoU exhibits a calcium-  
183 independent phospholipase A<sub>2</sub>-like activity (Dessen, 2000). Hence, we transfected  
184 recombinant ExoU protein (rExoU) or its enzymatically inactive mutant ExoU<sup>S142A</sup>  
185 (Tamura et al., 2004) in WT BMDMs and monitored for cell necrosis. Only  
186 macrophages transfected with active ExoU underwent to cell death, a process that  
187 was inhibited by the use of ferrostatin-1 or the phospholipase inhibitor MAFP (**Fig.**  
188 **2C**). In line, we found that ferrostatin-1 itself did not alter bacterial growth or ExoU

189 secretion (**Figs. S2C, D**), suggesting that ferrostatin-1 does not directly alter bacterial  
190 physiology nor expression/secretion of ExoU. Upon phospholipase activation  
191 arachidonic acid release can be metabolized and oxidized by various cellular  
192 enzymes, including cyclooxygenases 1 and 2 (COX1, COX2), lipoxygenases (ALOX5  
193 and ALOX12/15 in mice) or cytochrome p450 (CYPs) enzymes. Therefore, we  
194 transfected recombinant ExoU in WT, *Alox5<sup>-/-</sup>* or *Alox12/15<sup>-/-</sup>* BMDMs in presence or  
195 absence of various COX, CYP or different lipid peroxidation inhibitors (α-tocopherol,  
196 liproxstatin-1, Resveratrol, ferrostatin-1). Although we observed that all lipid  
197 peroxidation inhibitors have a strong inhibitory impact on cell death, cyclooxygenase,  
198 cytochrome P450 or lipoxygenase targeting did not interfere with ExoU-dependent  
199 cell necrosis, hence suggesting that those enzymes do not regulate lipid-  
200 peroxidation-dependent cell necrosis upon ExoU exposure (**Fig. 2D**). Importantly, we  
201 also observed that ferrostatin-1 delayed ExoU-induced cell necrosis, suggesting that  
202 either the phospholipase activity of ExoU promotes lipid peroxidation-independent  
203 cell death or that the inhibitory effect of ferrostatin-1 is unstable over time (**Fig. 2E**).  
204 Finally, we evaluated if the inhibition of lipid peroxidation would modulate  
205 macrophage and neutrophil microbicidal response upon *exoU*-expressing *P.*  
206 *aeruginosa* infection. We observed that ferrostatin-1 strongly improved both  
207 macrophage and neutrophil microbicidal activities to a level close to those observed  
208 in response to *exoU*-deficient *P. aeruginosa* (**Fig. 2F**), hence suggesting that *P.*  
209 *aeruginosa* ExoU relies on lipid peroxidation-dependent cell necrosis to escape from  
210 phagocyte attack. Together, our results suggest that host cell lipid peroxidation is  
211 important for ExoU-induced host cell necrosis and release of alarmins.

212

### 213 **Lipid peroxidation fuels ExoU phospholipase activity**

214 Lipid-peroxidation requires reactive oxygen species (ROS), such as H<sub>2</sub>O<sub>2</sub>, that can  
215 oxidize various phospholipids (Dixon et al., 2012). Therefore, we evaluated the ability  
216 of ExoU to induce ROS-dependent lipid peroxidation in macrophages. Although we  
217 observed that, 30 minutes after transfection, ExoU but not its catalytically inactivated  
218 mutant ExoU<sup>S142A</sup>, triggered an acute ROS production in BMDMs, we surprisingly  
219 failed to detect a robust lipid peroxidation accumulation as measured by the C11  
220 Bodipy probe (**Figs. 3A, S3A**). As control, the well-known lipid peroxidation inducer  
221 Cumene hydroperoxide (CuOOH) promoted cellular lipid peroxidation (**Fig. 3A**)



222 (Lovatt et al., 2020). In contrast, we observed that basal lipid peroxidation in cells  
223 was reduced upon ExoU transfection, a process that was further strengthened in  
224 presence of ferrostatin-1 (**Fig. 3A**).

225 These results suggest that, instead of promoting pathological lipid peroxidation, ExoU  
226 might actually use cellular lipid peroxidation to promote cell necrosis. To this regard,  
227 various host phospholipase A2 enzymes have been described to specifically cleave  
228 and remove peroxidised phospholipids from membranes (Beatty et al.; Beharier et  
229 al., 2020; Lu et al., 2019). To address this hypothesis, we performed a redox  
230 phospholipidomic approach to determine if ExoU could interfere with the endogenous  
231 levels of peroxidised phospholipids. We used a 45 min time-point to perform our  
232 experiments, as a point where plasma membrane permeabilization (propidium uptake  
233 monitoring) is not observed. This design excludes the possibility that a decrease in  
234 peroxidised phospholipids is due to cell necrosis induced by ExoU (**Fig. S3C**). We  
235 observed that *exoU*-treated macrophages had a decrease in peroxidised  
236 phospholipids as measured by the reduction in hydroperoxil (-OOH)- and hydroxyl (-  
237 OH)-phosphoinositols (PIs)/- phosphoserines (PSs) and - phosphocholines (PCs)  
238 with arachidonic acid (C20:4/C22:4) acid side chains (**Figs. 3B, S3B**).

239 In cells, peroxidised phospholipids are detoxified by various factors, one of the most  
240 important being the ferroptosis regulator glutathione peroxidase 4 (GPX4) (Dixon et  
241 al., 2012). Consequently, the use of pro oxidant molecules or *Gpx4* genetic  
242 inactivation both induce a strong accumulation of various peroxidised phospholipids  
243 in cell membranes (Dixon et al., 2012). Therefore, we hypothesized that  
244 prestimulation of macrophages with non-cytotoxic doses of the lipid peroxidation  
245 inducer Cumene hydroperoxide (20µM, 1h) might sensitize cells to ExoU-induced cell  
246 necrosis. We transfected recombinant *exoU* in WT BMDMs in presence or absence  
247 of non-toxic doses of the pro-oxidant Cumene hydroperoxide (CuOOH, 20µM, 1h)  
248 (Lovatt et al., 2020). Although CuOOH promoted lipid peroxidation but not BMDM cell  
249 death, *exoU* transfection specifically induced an increased cell necrosis in CuOOH-  
250 primed BMDMs, a process that was inhibited by the use of ferrostatin-1 (**Figs. 3C, D**).  
251 In agreement with this result, we measured a strong decrease in lipid peroxidation in  
252 CuOOH-primed cells transfected with *exoU*, confirming that ExoU efficiently targeted  
253 lipid peroxides induced by CuOOH (**Figs. 3C, D**). Finally, using Crispr-Cas9, we  
254 generated *Gpx4*<sup>-/-</sup> immortalized BMDMs (**Fig. S3D**). As previously observed by others



255 in other cell lines (Friedmann Angeli et al., 2014; Kagan et al., 2017), *Gpx4*<sup>-/-</sup>  
256 immortalized BMDMs exhibited increased basal levels of peroxidised lipids (**Fig.**  
257 **S3E**). Therefore, *exoU* transfection triggered faster cell death of *Gpx4*<sup>-/-</sup> macrophages  
258 than their WT counterpart, suggesting that lipid peroxidation of cells enhances ExoU-  
259 dependent toxicity (**Figs. 3E, S3D, E**).

260 Upon phospholipid peroxidation, arachidonic acid-containing phospholipids from  
261 isoprostanes, potent intra- and extra-cellular mediators (Bochkov et al., 2010; Tyurina  
262 et al., 2019). Once formed, these isoprostanes are released from phospholipids by  
263 the action of phospholipases (Bochkov et al., 2010; Tyurina et al., 2019). Therefore,  
264 we reasoned that if ExoU targets peroxidised phospholipids, this would promote  
265 ExoU phospholipase-dependent release of endogenous pre-formed isoprostanes.  
266 Accordingly, the release of the 8-PGF2 $\alpha$  isoprostane was specifically induced by  
267 ExoU in WT macrophages, a process that was further amplified by the co treatment  
268 of cells with non-toxic concentrations of Cumen hydroperoxide (CuOOH 20 $\mu$ M, 1 h)  
269 and ExoU (**Fig. 3F**). Of importance, ferrostatin-1 strongly inhibited ExoU- and  
270 ExoU/CuOOH-induced 8-PGF2 $\alpha$  release (**Fig. 3F**). In addition, we also detected that  
271 in CuOOH-primed macrophages, the amount of arachidonic acid-derived eicosanoids  
272 leukotriene B4 and prostaglandin E2, which are an indirect indication of the  
273 phospholipase activity of ExoU, were also strongly increased after the exposure to  
274 ExoU, hence suggesting that ExoU-targeted peroxidised phospholipids might  
275 increase its phospholipase activity toward all phospholipids (peroxidized or not) (**Fig.**  
276 **S3F**). Consequently, we measured the phospholipase activity of ExoU in cell lysates  
277 where we chemically induced non-lethal lipid peroxidation with Cumene  
278 hydroperoxide (CuOOH, 20 $\mu$ M) for 1 h or not. We observed that in CuOOH-primed  
279 cell lysates, ExoU exhibited a stronger activity than in unprimed samples after 4 h of  
280 incubation (**Fig. 3G**). Importantly, after 18 h incubation, we observed the same  
281 accumulation of hydrolysed substrate in CuOOH-primed and unprimed samples,  
282 which suggests that lipid peroxidation exacerbates the early activation of ExoU (**Fig.**  
283 **3G**). As control, ExoU<sup>S142A</sup>- treated cell lysates did not show a significant  
284 phospholipase activity induction, suggesting that we mostly measured the PLA2  
285 activity from ExoU, but not from cellular phospholipases (**Fig. 3G**). Finally, we aimed  
286 at challenging our findings by determining if other toxic phospholipases also had a  
287 similar activation pattern to ExoU. Hence, we transfected macrophages with the

288 closely related patatin-like phospholipase A2 from *Burkholderia thailandensis*  
289 (ExoU<sup>BitU</sup>) (Anderson et al., 2015). We observed that recombinant ExoU<sup>BitU</sup>  
290 transfection induced BMDMs necrosis, a process that was exacerbated by CuOOH  
291 priming and inhibited by the use of ferrostatin-1, suggesting that ExoU<sup>BitU</sup> also follows  
292 a pattern involving host cell lipid peroxidation (**Fig. 3H**). Altogether, our results  
293 suggest a surprising mechanism by which ExoU exploits cellular lipid peroxidation to  
294 trigger necrosis, a process that can be extended to the action of *B. thailandensis*  
295 ExoU<sup>BitU</sup>-related phospholipase.

296

### 297 **Ferrostatin-1 improves mouse resistance to infection by *exoU*-expressing *P.*** 298 ***aeruginosa***

299 ExoU-induced necrosis promotes host lung pathology, which leads to a sepsis like  
300 response as well as respiratory failure syndrome. Therefore, we hypothesized that  
301 ferrostatin-1 use could protect mice against *exoU*-expressing *P. aeruginosa*.  
302 Intranasal infection of mice using *P. aeruginosa* *exoU*<sup>+</sup> showed that mice  
303 intraperitoneally pre-treated with ferrostatin-1 (6 h before infection, 6mg.k<sup>-1</sup>) had  
304 diminished bacterial loads in BALFs, lungs and spleen. Ferrostatin-1 pre-treatment  
305 did not significantly modify bacterial loads of *exoU*-deficient bacteria, suggesting that  
306 ferrostatin-1 mainly modulates ExoU-dependent processes in mice (**Fig. 4A**).  
307 Similarly, ferrostatin-1 also attenuated ExoU-dependent alarmin release (e.g. IL-36γ,  
308 IL33, IL1α) and the level of oxidized lipids (isoprostanes, MDA) in the BALs (**Fig. 4B,**  
309 **C**). Additionally, evaluation of the cellular contents in BALFs showed that ferrostatin-1  
310 significantly protected a pool of alveolar macrophage upon *P. aeruginosa* challenge  
311 simultaneously decreasing the number of recruited neutrophils, eosinophils and  
312 monocytes (**Figs. 4D, S4A**). Although a pathological function of recruited immune  
313 cells such as neutrophils is probable, we hypothesize that ferrostatin-1-inhibited  
314 resident alveolar macrophage death in response to *exoU*-expressing *P. aeruginosa*  
315 might confer an improved immune protection characterized by lower immune cell  
316 recruitment and lower tissue damages. Regarding this, lung histological observations  
317 showed that the inflammatory status of mice infected with non-lethal doses of ExoU-  
318 expressing *P. aeruginosa* (1.10<sup>5</sup> CFUs) was improved in presence of ferrostatin-1  
319 (**Fig. 4E**). Next, we addressed survival upon ExoU-expressing *P. aeruginosa*  
320 challenge. We observed that ferrostatin-1-treated mice (4-6 h before infection, 6mg.k<sup>-1</sup>

321 <sup>1</sup>) had an improved survival rate than those treated with PBS after 40 h after infection  
322 (**Fig. 4F**). We validated that ferrostatin-1 specifically protected mice against ExoU-  
323 induced pathology as ferrostatin-1-treated mice did not show enhanced protection  
324 (survival) against ExoU-deficient *P. aeruginosa* (**Fig. 4F**). Finally, we aimed  
325 to evaluate if *P. aeruginosa* ExoU would trigger pathological lipid peroxidation-  
326 dependent cell necrosis in human bronchial organoids. Organoids were derived from  
327 normal lung tissue adjacent to tumors obtained from patients undergoing lung  
328 resection due to non-small cell lung carcinoma (NSCLC). Live cell imaging of  
329 organoids microinjected with *P. aeruginosa* showed that ExoU triggered complete  
330 organoid collapse (**Fig. 4G; Movies S7-S12**). Importantly, ferrostatin-1 strongly  
331 attenuated *P. aeruginosa*-dependent organoid damages (**Fig. 4G; Movies S7-S12**).  
332 Altogether, our results identified lipid peroxidation as a pathological mechanism  
333 induced by the *P. aeruginosa* ExoU phospholipase both in mice and in human  
334 bronchial organoids.

335

336

337

338

339

340

341

342

343

344

345

346

347

348

349

350

## 351 **Discussion**

352 As a preferential extracellular pathogen, *P. aeruginosa* uses its Type 3-Secretion  
353 System (T3SS) to inject virulence factors (Exo S, T, Y and U), allowing bacterial  
354 escape from phagocytic uptake and killing. Although *exoS*-expressing *P. aeruginosa*  
355 strains associate to the development of chronic infections, *exoU*-expressing *P.*  
356 *aeruginosa* triggers acute deadly infections that associate with a strong oxidative  
357 imbalance. In this study, we describe that endogenous basal lipid peroxidation  
358 contributes to ExoU-dependent cellular toxicity and mouse pathology. Though we do  
359 not exclude that *in vivo*, lipid peroxidation might play various pathological roles that  
360 go beyond the sole regulation of cell necrosis, such processes appear to be linked to  
361 ExoU expression. In this context, previous studies showed that ExoU promotes  
362 production of the platelet-activating factor or the 8-PGF<sub>2</sub>α isoprostane, two oxidized  
363 lipids (da Cunha et al., 2015). In addition, ExoU directly promotes a strong release of  
364 arachidonic acid from phospholipids. Enzymes such as cytochrome  
365 P450/COXs/LOXs can enzymatically produce oxygenated arachidonic products such  
366 as prostaglandin E<sub>2</sub>/leukotriene B<sub>4</sub> involved in pathological signalling pathways upon  
367 *P. aeruginosa* infection (Machado et al., 2011; Sadikot et al., 2007; Saliba et al.,  
368 2005). However, results from others and ours mostly suggest that, taken individually,  
369 those enzymes only play a negligible role in ExoU-induced cell necrosis (Machado et  
370 al., 2011; Sadikot et al., 2007; Saliba et al., 2005).

371 Although controlled phospholipid peroxidation is of importance for the cells to perform  
372 various processes such as efferocytosis through the engagement of peroxidised-PS,  
373 mitochondria-dependent apoptosis through cardiolipin peroxidation, signal  
374 transduction through peroxidised PC-derived lipids, unrestricted accumulation of  
375 peroxidised PEs drives ferroptosis (Bochkov et al., 2010; Tyurin et al., 2014; Tyurina  
376 et al., 2019). Specifically, ferroptosis is thought to be a constitutively activated form of  
377 cell death that is kept under control through the activity of endogenous regulators of  
378 lipid peroxidation such as GPX4, FSP1-mediated coQ10 production, α-tocopherol  
379 (vitamin E). In addition, the host cellular calcium (Ca<sup>2+</sup>)-independent PLA2γ, the  
380 peroriredoxin Prdx6 PLA2 or the PLA2G6 (Ca<sup>2+</sup>-independent PLA2β) can cleave and

381 remove preferentially peroxidised phospholipids, hence contributing to phospholipid  
382 peroxide detoxification (Beharier et al., 2020; Kinsey et al., 2008; van Kuijk et al.,  
383 1987; Lu et al., 2019; Miyamoto et al., 2003; Sevanian et al., 1988; Yedgar et al.,  
384 2006). The activity of those phospholipases is tightly regulated by various cellular  
385 systems (e.g. ROS levels, calcium fluxes, phospholipid composition) that ensure an  
386 optimal but not dysregulated phospholipid cleavage (Yedgar et al., 2006). To this  
387 regard, our findings that cellular phospholipid peroxidation is a strong enhancer of  
388 ExoU-induced pathological necrosis appears in first view counter intuitive. In this  
389 context, we envision that, as a virulence factor, ExoU activity does not follow host  
390 regulation and uses host peroxidised phospholipids to boost its patatin-like A2  
391 phospholipase activity allowing to aberrantly target and cleave host (peroxidised)  
392 phospholipids. Consequently, the use of lipid peroxidation inhibitors such as  
393 resveratrol, liproxstatin-1 or ferrostatin-1 attenuates the potency and the speed of  
394 ExoU-induced cell necrosis. This offers a key time window for macrophage and  
395 neutrophil-mediated bacterial uptake and killing. To the contrary, lipid peroxidation  
396 accumulation upon *Gpx4* removal or oxidant stress enhances ExoU-induced cellular  
397 necrosis. It is intriguing that endogenous peroxidised phospholipids favour ExoU-  
398 induced cell necrosis, suggesting that ExoU-expressing strains of *P. aeruginosa* take  
399 advantage of the host ferroptosis pathways to maximally damage host tissues.  
400 Hence, studying the importance of additional regulators of ferroptosis such as the  
401 cytochrome P450 oxidoreductase or the ACSL and LPCAT acyl transferases on  
402 ExoU-dependent toxicity warrants further investigations (Doll et al., 2017).

403 Phospholipases are also present in venoms or various microbial pathogens (e.g. *M.*  
404 *tuberculosis*, *L. monocytogenes*, *S. pyogenes*) and can also promote fast cell  
405 necrosis (Flores-Díaz et al., 2016; Hiu and Yap, 2020; Sitkiewicz et al., 2007).  
406 Conversely, we extended our findings to the ExoU closely related ExoU<sup>BTU</sup>  
407 phospholipase from *B. thailandensis*. Remarkably, snake, scorpion or spider venoms  
408 are a complex mixture of various components, including the L-amino acid oxidase,  
409 able to generate H<sub>2</sub>O<sub>2</sub>-driven lipid peroxidation, and secreted phospholipases able to  
410 cleave phospholipids (Hiu and Yap, 2020). In this context, it is tempting to speculate  
411 that venoms have all components necessary to mediate cell damage in a complex  
412 single-injection mixture. L-amino acid oxidase-induced lipid peroxidation might work  
413 with venom PLA2 to optimize phospholipid cleavage and subsequent cell necrosis.

414 Related to this, Sevanian and colleagues made pioneer observations that the PLA2  
415 activity from the snake *Crotalus adamanteus* is exacerbated in contact of liposomes  
416 constituted of peroxidised phospholipids, a process that is thought to be due to the  
417 better accessibility of the sn2-peroxidized fatty acid to phospholipase (Sevanian et  
418 al., 1988). Whether ExoU and its relatives follow a similar pathway of activation will  
419 be studied in future studies.

420 In a broader point of view, it is interesting to note that phospholipases can promote  
421 allergic shock associated with a strong release of the allergic alarmin interleukin-33  
422 (Palm et al., 2013), a signature we also observed in mice infected with ExoU-  
423 expressing *P. aeruginosa*. Should lipid peroxidation be involved in IL33-driven allergy  
424 or asthma in response to phospholipases or other allergens (e.g. proteases) (Cayrol  
425 et al., 2018) will require additional study.

426 Understanding the mechanisms of regulated cell necrosis and their physio-  
427 pathological consequences is currently driving intensive research and debates. While  
428 the importance of lipid peroxidation in antigen presentation, anti-cancer treatments or  
429 in exacerbating neurodegenerative diseases becomes more and more clear, its  
430 function in infectious diseases remains less studied. Regarding this, Dar et al.,  
431 recently described that, upon chronic infection, secreted *P. aeruginosa* lipoxygenase  
432 (loxA) could sensitize cells to lipid peroxidation-induced ferroptosis (Dar et al., 2018).  
433 In addition, Kain and colleagues recently linked regulation of host lipid peroxidation  
434 and ferroptosis to restriction of liver-stage malaria, which suggests that host  
435 peroxidised phospholipids might play yet unsuspected functions in immunity or  
436 susceptibility to various pathogens (Kain et al., 2020). Thus, our findings that the  
437 bacterial patatin-like phospholipase A2 ExoU contributes to pathology by exploiting  
438 target cells lipid peroxidation adds an additional piece of significance for the role of  
439 lipid peroxidation in infectious diseases but also offers novel insights to target host  
440 lipid peroxidation pathways in the frame of infectious diseases.

441

442

443

444

445

446

## 447 **ACKNOWLEDGEMENTS**

448 *Alox5<sup>-/-</sup>* and *Alox12/15<sup>-/-</sup>* mice came from Agnes Coste (Univ. of Toulouse, France).  
449 *Nlrc4<sup>-/-</sup>* mice were provided by Clare E. Bryant and generated by Millenium, *GsdmD<sup>-/-</sup>*  
450 *<sup>-/-</sup>* mice came from P. Broz (Univ of Lausanne), and *Casp1<sup>-/-</sup>/ Casp11<sup>-/-</sup>* came from  
451 B. Py (ENS Lyon, France) and were generated by Junying Yuan (Harvard Med  
452 School, Boston, USA). Dara Frank provided essential plasmids, protocols and  
453 advices for recombinant phospholipase production and purification. Phospholipid  
454 redox lipidomic experiments were performed by Cayman Chemical Company (Ann  
455 Arbor, USA). Authors also acknowledge the animal facility and Cytometry/microscopy  
456 platforms of the IPBS institute. This project was funded by grants from the National  
457 Research Agency (ANR, Endiabac), FRM “Amorçage Jeunes Equipes”  
458 (AJE20151034460), ERC StG (INFLAME 804249) and ATIP-Avenir program to EM,  
459 from National Research Agency (ANR, MacGlycoTB) to YR, from the European  
460 Society of Clinical Microbiology and Infectious Diseases (ESCMID, 2020) to RP, from  
461 the Van Gogh Programme to IPBS-M4i institutes, from Invivogen-CIFRE  
462 collaborative PhD fellowship to MP and from Mali and Campus France cooperative  
463 agencies to SB. The authors acknowledge Ida Rossi, Ines Lakehal and David Péricat  
464 for manuscript reading and implementing.

465

## 466 **AUTHOR CONTRIBUTIONS**

467 SB, RP and EM designed the experiments. SB, RP and EM wrote the manuscript. SB  
468 and RP performed the experiments with the help of SLI, MP, AH, KS, EE, PJB, EN,  
469 AB, CB, NI, AM, YR and CC. RP and EM supervised the entire study. LL, AC, IA,  
470 DWF, HC and PJP provided essential tools, reagents and expertise to conduct the  
471 project.

472

## 473 **CONFLICT OF INTEREST**

474 Authors have no conflict of interest to declare.



475

476

477

## 478 **FIGURE LEGENDS**

479

### 480 **Figure 1: ExoU-dependent lung pathology in mice associates to an alarmin and** 481 **peroxidized lipid signature**

482 **(A)** Survival of WT mice intranasally infected (n=7 animals per condition) with  $5.10^5$   
483 CFUs of *P. aeruginosa* PP34 or its isogenic mutant PP34<sup>exoU-</sup>. Graphs represent one  
484 experiment (8 mice/group) out of three independent *in vivo* experiments. Log-rank  
485 Cox-Mantel test was used for survival comparisons. \*\*\*p ≤ 0.001

486 **(B)** Bronchoalveolar (BAL), lung, blood and spleen bacterial loads from WT mice  
487 (n=8) 18 hours after intranasal infection with  $5.10^5$  CFUs of *P. aeruginosa* PP34 or its  
488 isogenic mutant PP34<sup>exoU-</sup>. Graphs represent one experiment (8 mice/group) out of  
489 three independent *in vivo* experiments. \*\*p ≤ 0.01, Mann-Whitney analysis test.

490 **(C)** Alarmin levels in bronchoalveolar fluids (BALFs) from WT mice (n=8) 6 hours  
491 after intranasal infection with  $5.10^5$  CFUs of *P. aeruginosa* PP34 or its isogenic  
492 mutant PP34<sup>exoU-</sup>. Graphs represent one experiment (8 mice/group) out of three  
493 independent *in vivo* experiments; \*p ≤ 0.05; \*\*p ≤ 0.01, Mann-Whitney analysis test.

494 **(D)** Prostaglandin E2 (PGE2) and Leukotriene B4 (LTB4) levels in bronchoalveolar  
495 fluids (BALFs) from WT mice (n=8) 6 hours after intranasal infection with  $5.10^5$  CFUs  
496 of *P. aeruginosa* PP34 or its isogenic mutant PP34<sup>exoU-</sup>. Graphs represent one  
497 experiment (8 mice/group) out of three independent *in vivo* experiments; \*\*p ≤ 0.01,  
498 Mann-Whitney analysis test.

499 **(E)** Peroxidized lipid product (isoprostanes and MDA) levels in bronchoalveolar fluids  
500 (BALFs) from WT mice (n=8) 6 hours after intranasal infection with  $5.10^5$  CFUs of *P.*  
501 *aeruginosa* PP34 or its isogenic mutant PP34<sup>exoU-</sup>. Graphs represent one experiment  
502 (8 mice/group) out of three independent *in vivo* experiments; \*p ≤ 0.05; \*\*p ≤ 0.01,  
503 Mann-Whitney analysis test.

504 Data information: Data shown as means (**Graphs B-E**) and are representative of one  
505 experiment performed three times; \* $p \leq 0.05$ ; \*\* $p \leq 0.01$ , \*\*\* $p \leq 0.001$ , Mann-Whitney  
506 analysis test (**B-E**) and log-rank Cox-Mantel test for survival comparisons (**A**).

507 **Figure 2: Lipid peroxidation inhibition delays ExoU-induced cell necrosis**

508 Otherwise specified, cells were infected with an MOI of 0.5 of *P. aeruginosa* PP34,  
509 PP34<sup>exoU-</sup> or PP34<sup>exoUS142A</sup> for various times. \*\*\* $p \leq 0.001$ , T-test with Bonferroni  
510 correction.

511 **(A, B)** Measure of LDH and alarmin/cytokine release in *Nlrc4*<sup>-/-</sup> BMDMs infected with  
512 PP34 or PP34<sup>exoU-</sup> in presence of Z-VAD (40 $\mu$ M), olaparib (10 $\mu$ M), Necrostatin-1s  
513 (Ne1s, 40 $\mu$ M) or Ferrostatin-1 (Fe1, 10 $\mu$ M) for 2 hours. \*\*\* $p \leq 0.001$ , T-test with  
514 Bonferroni correction.

515 **(C)** Measure of LDH release in WT BMDMs transfected with recombinant ExoU  
516 (100ng), in presence of MAFP (50 $\mu$ M) or Ferrostatin-1 (Fe1, 10 $\mu$ M) for 3 hours. \*\*\* $p$   
517  $\leq 0.001$ , T-test with Bonferroni correction.

518 **(D)** Heat map representing measure of LDH release in WT, *ALOX5*<sup>-/-</sup> and *ALOX12/15*  
519 BMDMs transfected with recombinant ExoU in presence/absence of Cox1 inhibitor  
520 (Ketorolac Tromethamine, 10 $\mu$ M), Cox2 inhibitor (NS 398, 25 $\mu$ M), Cyp450  
521 epoxygenase activity inhibitor (PPOH, 10 $\mu$ M), phospholipase inhibitor MAFP (50 $\mu$ M)  
522 or lipid peroxidation inhibitors Ferrostatin-1 (Fe1, 20 $\mu$ M), Resveratrol (5 $\mu$ M),  
523 Liproxstatin-1 (30 $\mu$ M),  $\alpha$ -Tocopherol (20 $\mu$ M) for 2 hours. The heat map shows the  
524 mean of three combined independent experiments, each performed in triplicate.

525 **(E)** Time course measure of plasma membrane permeabilization using propidium  
526 iodide incorporation in *Nlrc4*<sup>-/-</sup> BMDMs infected with PP34, PP34<sup>exoU-</sup> or PP34<sup>exoUS142A</sup>  
527 in presence of Ferrostatin-1 (Fe1, 20 $\mu$ M). \*\*\* $p \leq 0.001$ , T-test with Bonferroni  
528 correction.

529 **(F)** Microbicidal activity of macrophages (5h) and neutrophils (3h) after infection with  
530 *P. aeruginosa* *exoU*<sup>+</sup> and *exoU* (MOI 0.5) in presence/absence of ferrostatin-1  
531 (10 $\mu$ M). \*\*\* $p \leq 0.001$ , T-test with Bonferroni correction.

532

533 Data information: Data are represented as means $\pm$  SEM (graphs A- F) from n = 3  
534 independent pooled experiments; \*\*\*P  $\leq$  0.001 for the indicated comparisons using t-  
535 test with Bonferroni correction.

536

537 **Figure 3: ExoU-induced cell death involves ROS-induced lipid peroxidation but**  
538 **proceeds in a ferroptosis independent manner**

539 **(A)** Cytometry detection and quantification of (phosphor)lipid peroxidation using the  
540 probe C11-bodipy in WT BMDMs treated with CuOOH (20 $\mu$ M) or transfected with  
541 rExoU (500ng) or its catalytically dead mutant rExoU<sup>S142A</sup> (500ng) for 1 hour in  
542 presence or absence of Ferrostatin-1 (20 $\mu$ M). Sample were acquired using  
543 FACSCalibur™ (BD). The graphs shows the mean $\pm$ -SEM of one experiment  
544 performed in triplicate out of three independent experiments. \*\*P $\leq$ 0.001, \*\*\*P  $\leq$  0.001  
545 for the indicated comparisons using t-test with Bonferroni correction.

546 **(B)** (Redox) lipidomic analysis of phospholipid peroxidation in BMDMs transfected  
547 with recombinant ExoU or its catalytically dead mutant ExoU<sup>S142A</sup> for 45 minutes.  
548 Each value is standardized to the corresponding phospholipid content shown in **(Fig**  
549 **S3B)**. The heat map shows the mean of one experiment performed in triplicate.

550 **(C)** Cytometry detection and quantification of (phosphor)lipid peroxidation using the  
551 probe C11-bodipy in WT BMDMs pre-treated or not for 1 hour with CuOOH (20 $\mu$ M) in  
552 presence or absence of Ferrostatin-1 (20 $\mu$ M) and then transfected with rExoU  
553 (500ng) for 1 hour. Sample were acquired using FACSCalibur™ (BD). The graphs  
554 shows the mean $\pm$ -SEM of one experiment performed in triplicate out of three  
555 independent experiments. \*P  $\leq$  0.05, \*\*P $\leq$ 0.001, for the indicated comparisons using  
556 t-test with Bonferroni correction.

557 **(D)** Measure of LDH release in WT BMDMs pre-treated or not for 1 hour with CuOOH  
558 (20 $\mu$ M) in presence or absence of Ferrostatin-1 (20 $\mu$ M) and then transfected with  
559 rExoU (500ng) for 3 hours. \*\*\*p  $\leq$  0.001, T-test with Bonferroni correction.

560 **(E)** Time course measure of plasma membrane permeabilization using propidium  
561 iodide incorporation in immortalised WT and *Gpx4*<sup>-/-</sup> BMDMs transfected with rExoU  
562 (500ng) for 7 hours. \*\*\*p  $\leq$  0.001, T-test with Bonferroni correction.

563 **(F)** Measure of 8-iso PGF2 $\alpha$  isprostane in cell supernatant in WT BMDMs pre-treated  
564 or not for 1 hour with CuOOH (20 $\mu$ M) in presence or absence of Ferrostatin-1 (20 $\mu$ M)  
565 and then transfected with rExoU (500ng) for 3 hours. \*\*\*p  $\leq$  0.001, T-test with  
566 Bonferroni correction.

567 **(G)** ExoU phospholipase activity determination in WT BMDM lysates pre-treated or  
568 not with CuOOH (20 $\mu$ M, 1hour). 100 pmols of ExoU were used and phospholipase  
569 hydrolysis rate (nmoles of substrate hydrolysed/nmole of ExoU) was measured after  
570 4 h and 16 hours. \*\*\*p  $\leq$  0.001, T-test with Bonferroni correction.

571 **(H)** Measure of LDH release in WT BMDMs primed or not with CuOOH (20 $\mu$ M,  
572 1hour) in presence or absence of ferrostatin-1 (20 $\mu$ M) and transfected for 3 hours  
573 with 5 $\mu$ g of rExoU<sup>BtU</sup> or 500ng rExoU. \*\*\*p  $\leq$  0.001, T-test with Bonferroni correction.

574

575 Data information: Data are plotted as means $\pm$  SEM (**E-H**) from n = 3 independent  
576 pooled experiments; \*\*\*P  $\leq$  0.001 for the indicated comparisons using t-test with  
577 Bonferroni correction.

578

#### 579 **Figure 4: Ferrostatin-1 protects mice against ExoU-induced lung pathology**

580 **(A)** Bronchoalveolar (BAL), lung and spleen bacterial loads from WT mice  
581 (n=7/group) 18 hours after intranasal infection with 5.10<sup>5</sup> CFUs of *P. aeruginosa*  
582 PP34 or its isogenic mutant PP34<sup>exoU-</sup>. When specified, mice were intraperitoneally  
583 pretreated with ferrostatin-1 (6mg.k<sup>-1</sup> or PBS) 4 hours before intranasal infection.  
584 Graphs represent one experiment (7 mice/group) out of three independent *in vivo*  
585 experiments. \*\*p  $\leq$  0.01, Mann-Whitney analysis test. NS: Not significant

586 **(B, C)** Alarmin and lipid peroxide products levels in bronchoalveolar fluids (BALFs)  
587 from WT mice (n=7 mice/group) 6 hours after intranasal infection with 5.10<sup>5</sup> CFUs of  
588 *P. aeruginosa* PP34 or its isogenic mutant PP34<sup>exoU-</sup>. When specified, mice were  
589 intraperitoneally pretreated with ferrostatin-1 (6mg.k<sup>-1</sup> or PBS) 4 hours before  
590 intranasal infection. Graphs represent one experiment (7 mice/group) out of three  
591 independent *in vivo* experiments; \*p  $\leq$  0.05; \*\*p  $\leq$  0.01, Mann-Whitney analysis test.

592 **(D)** Immune cell (CD45+) populations in bronchoalveolar fluids (BALFs) from WT  
593 mice (n=7 mice/group) 6 hours after intranasal infection with  $5.10^5$  CFUs of *P.*  
594 *aeruginosa* PP34 or its isogenic mutant PP34<sup>exoU-</sup>. When specified, mice were  
595 intraperitoneally treated with ferrostatin-1 (6mg.k<sup>-1</sup> or PBS) 4-6 hours before  
596 intranasal infection. Graphs represent one experiment (7 mice/group) out of three  
597 independent *in vivo* experiments; \*p ≤ 0.05; \*\*p ≤ 0.01, Mann-Whitney analysis test.

598 **(E)** Histological observation and scoring of bronchial and lung cellular infiltrations  
599 upon *exoU*-expressing *P. aeruginosa* intranasal infection. When specified, mice were  
600 intraperitoneally pretreated with ferrostatin-1 (6mg.k<sup>-1</sup> or PBS) 4-6 hours before  
601 intranasal infection. Stars show the cellular infiltrates. \*p ≤ 0.05; Mann-Whitney  
602 analysis test.

603 **(F)** Mice survival (n=7 mice/group) 40 hours after intranasal infection with  $5.10^5$  CFUs  
604 of *P. aeruginosa* PP34 or its isogenic mutant PP34<sup>exoU-</sup>. Mice were intraperitoneally  
605 pretreated with ferrostatin-1 (6mg.k<sup>-1</sup> or PBS) 4 hours before intranasal infection.  
606 Graphs represent one experiment (7 mice/group) out of three independent *in vivo*  
607 experiments; \*\*p ≤ 0.01, Log-rank Cox-Mantel test was used for survival  
608 comparisons.

609 **(G, H)** Time-lapse microscopy and the associated quantifications of the measure of  
610 plasma membrane permeabilization using propidium iodide incorporation in human  
611 primary bronchial organoids infected (microinjection) with *P. aeruginosa* expressing  
612 *exoU*<sup>+</sup> or its isogenic mutant (*exoU*) in presence or absence of ferrostatin-1 (40μM)  
613 for 15 hours. Data are plotted as means± SEM. \*\*\*p ≤ 0.001, T-test with Bonferroni  
614 correction.

615 Data information: Data shown as means (**Graphs A-E**) and are representative of one  
616 experiment performed three times; \*p ≤ 0.05; \*\*p ≤ 0.01, Mann-Whitney analysis test  
617 (**A-E**) and log-rank Cox-Mantel test for survival comparisons (**F**).

618

619

620

621

622

623

624

625

626

627

628 **STAR Method**

629 **Table 1:** Resource of reagents used in this study

630 Information and reagents are available upon request to [Etienne.meunier@ipbs.fr](mailto:Etienne.meunier@ipbs.fr)

| REAGENT or RESOURCE                | SOURCE                           | IDENTIFIER                  |
|------------------------------------|----------------------------------|-----------------------------|
| <b>Antibodies</b>                  |                                  |                             |
| GPX4, 1/1000                       | abcam                            | ab125066                    |
| ExoU, 1/1000                       | Ina Attree/CNRS, France.         | (Deruelle et al., 2020)     |
| Gapdh 1/10000                      | Gentex                           | GTX100118                   |
| Goat anti-Rabbit HRP (1/10000)     | Advansta                         | R-05072-500                 |
| <b>Bacterial and Virus Strains</b> |                                  |                             |
| PAO1                               | J. Buyck/Univ of Poitiers/France | N.A.                        |
| PP34                               | Ina Attree/CNRS, France.         | (Deruelle et al., 2020)     |
| PP34 $exoU$                        | Ina Attree/CNRS, France.         | (Deruelle et al., 2020)     |
| PP34 $exoU^{S142A}$                | Ina Attree/CNRS, France.         | (Deruelle et al., 2020)     |
| CHA                                | Ina Attree/CNRS, France.         | (Deruelle et al., 2020)     |
| CHAdST                             | Ina Attree/CNRS, France.         | (Deruelle et al., 2020)     |
| CHAdST $exoU^+$                    | Ina Attree/CNRS, France.         | (Deruelle et al., 2020)     |
| PA103                              | J. Buyck/Univ of Poitiers/France | N.A.                        |
| PA103 $exoU$                       | J. Buyck/Univ of Poitiers/France | N.A.                        |
| PA14                               | J. Buyck/Univ of Poitiers/France | N.A.                        |
| PA14 $exoU$                        | J. Buyck/Univ of Poitiers/France | N.A.                        |
| <b>Biological Samples</b>          |                                  |                             |
| Human lung biopsy                  | Hospital of Toulouse             | CHU 19 244 C<br>CNRS 205782 |

|                                                                                      |                           |                         |
|--------------------------------------------------------------------------------------|---------------------------|-------------------------|
| Human blood                                                                          | EFS                       | 21PLER2017-0035AV02     |
| Chemicals, Peptides, and Recombinant Proteins                                        |                           |                         |
| Recombinant ExoU                                                                     | This study                | (Anderson et al., 2015) |
| Recombinant ExoUS142A                                                                | This study                | (Anderson et al., 2015) |
| FCS                                                                                  | Fisher Scientific         | 16010-159               |
| mMCSF                                                                                | L929 cell supernatant     | NA                      |
| HEPES                                                                                | Fisher Scientific         | SH30237.01              |
| Non-essential amino acids                                                            | Invitrogen                |                         |
| ECL Clarity Max Substrate                                                            | BioRad                    | 1705060                 |
| ECL Clarity Max Substrate                                                            | BioRad                    | 1705062                 |
| Western Blot Strip Buffer                                                            | Diagomics                 | R-03722-D50             |
| Tris base                                                                            | euromedex                 | 200923-A                |
| SDS ultra-pure (4x)                                                                  | Euromedex                 | 1012                    |
| Acrylamide / Bisacrylamide 37.5/1 30%                                                | Euromedex                 | EU0088-B                |
| Temed                                                                                | Sigma                     | T9281-25ML              |
| Ammonium persulfate                                                                  | Sigma                     | 248614-100g             |
| Page Ruler 10-180 kDa                                                                | Fisher Scientific         | 15744052                |
| Triton X-100                                                                         | Euromedex                 | 2000                    |
| DMEM                                                                                 | Fisher Scientific         | 41965-039               |
| LB                                                                                   | Fisher Scientific         | BP1426-2                |
| LB Agar                                                                              | INVITROGEN                | 22700025                |
| Roche protease inhibitor cocktail                                                    | Sigma                     | 0000000116974980<br>01  |
| BSA                                                                                  | SIGMA                     | A9647-100G              |
| Propidium iodide                                                                     | Invitrogen                | P3566                   |
| Beads Neutrophils human                                                              | Miltenyi biotec           | 130-104-434             |
| Beads Neutrophils murine                                                             | Miltenyi biotec           | 130-120-337             |
|                                                                                      |                           |                         |
| Kit de coloration bleue et fixable des cellules mortes LIVE/DEAD™ pour excitation UV | ThermoFisher Scientifique | L34961                  |
| APC/Cyanine7 anti-mouse CD45 Antibody                                                | BioLegend                 | 103116                  |
| PE/Dazzle™ 594 anti-human CD64 Antibody                                              | BioLegend                 | 305032                  |
| FITC anti-mouse MERTK (Mer) Antibody                                                 | BioLegend                 | 151504                  |
| CD170 (Siglec F) Monoclonal Antibody (1RNM44N), Super Bright 780,                    | eBioscience               | 78-1702-82              |
| Ly-6G Monoclonal Antibody (1A8-Ly6g), APC                                            | eBioscience               | 17-9668-82              |
| Brilliant Violet 650™ anti-mouse/human CD11b Antibody                                | BioLegend                 | 101259                  |
| Brilliant Violet 421™ anti-mouse Ly-6C Antibody                                      | BioLegend                 | 128032                  |
| PE/Cyanine7 anti-mouse CD11c Antibody                                                | BioLegend                 | 117318                  |
| Eosinophil differentiation cocktail (IL-5)                                           | R&D Systems               | 405-ML-005              |
| Eosinophil differentiation cocktail (SCF)                                            | BioLegend                 | 579706                  |
| Eosinophil differentiation cocktail (Flt-3)                                          | BioLegend                 | 550706                  |
|                                                                                      |                           |                         |
| Puromycin                                                                            | ThermoFisher Scientifique | A1113803                |
| G418 (Geneticin)                                                                     | invivoGen                 | ant-gn-1                |



|                                                      |                   |             |
|------------------------------------------------------|-------------------|-------------|
| Blasticidin                                          | nvivoGen          | ant-bl-1    |
|                                                      |                   |             |
| Cumene hydroperoxide                                 | Sigma-Aldrich     | 247502-5G   |
| RSL3                                                 | Sigma-Aldrich     | SML2234     |
| Ferostatin-1                                         | Sigma-Aldrich     | SML0583     |
| Liproxstatin-1                                       | Sigma-Aldrich     | SML1414     |
| DFO                                                  | Sigma-Aldrich     | D9533       |
| a-tocopherol                                         | Sigma-Aldrich     | 258024      |
| MAFP                                                 | Sigma-Aldrich     | M2689       |
| PPOH                                                 | CaymanChem        | 75770       |
| Cox1 inhibitor                                       | Ab142904 (Abcam)  | Ab142904    |
| Cox2 inhibitor                                       | NS 398 (Abcam)    | Ab120295    |
| cPLA2 assay kit                                      | Cayman Chemical   | 765021      |
|                                                      |                   |             |
|                                                      |                   |             |
| CD14+ beads                                          | Miltenyi biotec   | 130-050-201 |
| RPMI                                                 | Fisher Scientific | 72400-021   |
| OPTIMEM                                              | Fisher Scientific | 31985-04    |
| Z-VAD                                                | Invivogen         | tlrl-vad    |
| Olaparib                                             | CaymanChem        | 10621       |
| Necrostatin-1s                                       | Sigma-Aldrich     | N9037 10MG  |
| hMCSF                                                | Miltenyi biotec   | 170-076-171 |
| Fisher BioReagents™ Lymphocyte Separation Medium-LSM | Fisher Scientific | BP2663500   |
| ExoU                                                 | This study        | N.A.        |
| ExoUS142A                                            | This study        | N.A.        |
| <b>Human bronchial organoid culture reagents</b>     |                   |             |
| Advanced DMEM/F12                                    | Invitrogen        | 12634028    |
| Gibco™ L-Glutamine (200 mM)                          | Fisher            | 11500626    |
| Hepes 1 M                                            | Fisher            | 11560496    |
| Penicillin/Streptomycin                              | Fisher            | 11548876    |
| Primocin                                             | Invivogen         | ant-pm-1    |
| Basic Media                                          | In house          | NA          |
| Rspol                                                | In house          | NA          |
| Noggin                                               | In house          | NA          |
| B27                                                  | Gibco/Invitrogen  | 17504044    |
| N-Acetylcysteine                                     | Sigma             | A9165-5g    |
| Nicotinamide                                         | Sigma             | N0636       |
| Y-27632                                              | Cayman            | 10005583    |
| A83-01                                               | Tocris            | 2939        |
| SB 202190                                            | Sigma             | S7067       |
| FGF-7                                                | Peprtech          | 100-19      |
| FGF-10                                               | Peprtech          | 100-26      |
| <b>Critical Commercial Assays</b>                    |                   |             |
| mIL-1alpha ELISA kit                                 | Fisher Scientific | 88-5019-88  |
| mIL-36g ELISA kit                                    | Ray Biotech       | ELM-IL36G   |
| LDH Cytotoxicity Detection Kit                       | Takara            | MK401       |
| mTNFalpha ELISA kit                                  | Fisher Scientific | 88-7324-22  |

|                                                                                   |                         |                                                  |
|-----------------------------------------------------------------------------------|-------------------------|--------------------------------------------------|
| mIL-33 ELISA kit                                                                  | Fisher Scientific       | 88-7333-88                                       |
| mHMGB1 ELISA kit                                                                  | Clinisciences           | LS-F4040-1                                       |
| TBAR MDA colorimetric kit                                                         | Cayman                  | 10009055                                         |
| PGE2 EIA Kit                                                                      | Cayman                  | 514010                                           |
| LTB4 EIA kit                                                                      | Cayman                  | 520111                                           |
| 8-PGF2 EIA kit                                                                    | Cayman                  | 516351                                           |
| H2DCFDA ROS detecting probe                                                       | Invitrogen              | D399                                             |
| C11 bodipy phospholipid peroxide detection probe                                  | Invitrogen              | D3861                                            |
| <b>Experimental Models: Cell Lines</b>                                            |                         |                                                  |
| WT Mouse Bone marrow derived macrophages                                          | This study              |                                                  |
| Alox5 <sup>-/-</sup> Mouse Bone marrow derived macrophages                        | This study              |                                                  |
| Alox12/15 <sup>-/-</sup> Mouse Bone marrow derived macrophages                    | This study              |                                                  |
| Nlrc4 <sup>-/-</sup> Mouse Bone marrow derived macrophages                        | This study              |                                                  |
| Casp1 <sup>-/-</sup> /Casp11 <sup>-/-</sup> Mouse Bone marrow derived macrophages | This study              |                                                  |
| GsdmD <sup>-/-</sup> Mouse Bone marrow derived macrophages                        | This study              |                                                  |
| WT Mouse bone marrow derived eosinophils                                          | This study              |                                                  |
| WT Mouse bone marrow derived neutrophils                                          | This study              |                                                  |
| Human blood monocyte derived macrophages                                          | This study              |                                                  |
| Human blood neutrophils                                                           | This study              |                                                  |
| Immortalized WT murine bone marrow derived macrophages                            | This study              |                                                  |
| Immortalized Gpx4 <sup>-/-</sup> murine bone marrow derived macrophages           | This study              |                                                  |
|                                                                                   |                         |                                                  |
| Human Bronchial epithelial cells                                                  | This study              |                                                  |
| Human Alveolar epithelial A549 cell line                                          | This study              |                                                  |
| Human intestinal epithelial HELA cell line                                        | This study              |                                                  |
| <b>Experimental Models: Organisms/Strains</b>                                     |                         |                                                  |
| WT C57Bl6J mice                                                                   | C. Rivers               |                                                  |
| WT C57Bl6N mice                                                                   | C. Rivers               |                                                  |
| Alox5 <sup>-/-</sup> C57Bl6 mice                                                  | A.Coste                 | (Lefèvre et al., 2015)                           |
| Alox12/15 <sup>-/-</sup> C57Bl6 mice                                              | A.Coste                 | (Lefèvre et al., 2015)                           |
| Nlrc4 <sup>-/-</sup> C57Bl6 mice                                                  | C.Bryant                | (Man et al., 2014)                               |
| Casp1 <sup>-/-</sup> /Casp11 <sup>-/-</sup> C57Bl6 mice                           | B.Py/ Junying Yuan      | (Li et al., 1995)                                |
| GsdmD <sup>-/-</sup> C57Bl6 mice                                                  | P.Broz                  | (Demarco et al., 2020)                           |
| Human Bronchial organoids                                                         | This study              | (Bartfeld and Clevers, 2015; Sachs et al., 2019) |
| <b>Oligonucleotides</b>                                                           |                         |                                                  |
| Guide Crispr mGpx4- Exon1 Forward                                                 | Sigma-Aldrich           | GGACGCTGCAGA<br>CAGCGCGG                         |
| <b>Recombinant DNA</b>                                                            |                         |                                                  |
| Plasmid: ExoU                                                                     | (Anderson et al., 2015) | (Anderson et al., 2015)                          |
| Plasmid: ExoUS142A                                                                | (Anderson et al., 2015) | (Anderson et al., 2015)                          |
| Plasmid: ExoU <sup>BTU</sup>                                                      | (Anderson et al., 2015) | (Anderson et al., 2015)                          |
| LentiGuide-Puro                                                                   | Feng Zhang lab          | Addgene #52963                                   |
| Lenti-multi-Guide                                                                 | From Qin Yan            | Addgene #85401                                   |

|                                |                                    |                |
|--------------------------------|------------------------------------|----------------|
| pMD.2G                         | Didier Trono lab                   | Addgene #12259 |
| p8.91                          | Didier Trono lab                   | N.A.           |
| LentiCas9-Blast                | Feng Zhang lab                     | Addgene #52962 |
| <b>Software and Algorithms</b> |                                    |                |
| Graph Pad Prism 8.0            |                                    |                |
| Image J                        |                                    |                |
| Snappgene                      | GSL Biotech LLC,<br>Chicago, U.S.A |                |
| FlowJO                         | FlowJo LLC                         |                |
| Benchling Software             |                                    |                |
| Other                          |                                    |                |

631

## 632 **Mice**

633 *Nlr4<sup>-/-</sup>*, *Casp1<sup>-/-</sup>Casp11<sup>-/-</sup>*, *GsdmD<sup>-/-</sup>*, *ALOX12/15<sup>-/-</sup>* and *ALOX5<sup>-/-</sup>* mice were  
634 generated and described in previous studies (Demarco et al., 2020; Lefèvre et al.,  
635 2015; Li et al., 1995; Man et al., 2014). Mice were bred at the IPBS (Toulouse,  
636 France) animal facilities in agreement to the EU and French directives on animal  
637 welfare (Directive 2010/63/EU). Charles Rivers provided WT C57BL/6 mice.

638

## 639 **Animal infection models**

640 6-10 mice/group were intranasally infected with  $5 \cdot 10^5$  Colony Forming Units (CFUs)  
641 of *P. aeruginosa* PP34 strain (*ExoU<sup>t</sup>*) or its isogenic mutant (*ExoU*) and animal  
642 survival was followed over 40-50 hours after infection. When specified, mice were  
643 intraperitoneally treated with 100 $\mu$ L of PBS or ferrostatin-1 (6mg.k<sup>-1</sup>) 4-6 hours before  
644 intranasal infections with bacterial strains.

645 Regarding bacterial loads assays, 6-10 mice/group were intranasally infected with  
646  $2 \cdot 10^5$  bacteria for 24 hours, and Bronchoalveolar (BALs), lung spleen and blood  
647 bacterial numbers were evaluated using CFU plating. BAL fluids (BALFs) were also  
648 used to address cytokine, alarmin and lipid levels using ELISA, EIA and colorimetric  
649 kits. There were no randomization or blinding performed.

650 Animal experiments were approved (License APAFIS#8521-2017041008135771,  
651 Minister of Research, France) and performed according to local guidelines (French  
652 ethical laws) and the European Union animal protection directive (Directive  
653 2010/63/EU).

654

## 655 **Histological experiments and scoring**

656 Mice were intraperitoneally treated with 100 $\mu$ L of PBS or ferrostatin-1 (6mg.k<sup>-1</sup>) 4-6  
657 hours before intranasal infections with sub-lethal doses (2.10<sup>5</sup> CFUs) of *exoU*-  
658 expressing *P. aeruginosa*. 6 hours later, lung tissues were fixed for 48 h in 10%  
659 buffered formalin, washed 3 times in ethanol 70% and embedded in paraffin. 5  $\mu$ m  
660 sections were stained with hematoxylin and eosin (HE). Histopathological scoring  
661 from 0 to 3 were attributed based on the severity of peribronchial, perivascular, and  
662 interstitial cell infiltration, resulting in a maximum score of 9.

## 663 **Bacterial cultures**

664 *P. aeruginosa* (PP34, PA103, CHA, PAO1, PA14) bacteria and their isogenic mutants  
665 were grown overnight in Luria Broth (LB) medium at 37°C with aeration and constant  
666 agitation in the presence or absence of EGTA (10mM) to ensure T3SS expression.  
667 Bacteria were sub-cultured the next day by dilution overnight culture 1/50 and grew  
668 until reaching an optical density (OD) O.D600 of 0.6 – 1. Bacterial strains and their  
669 mutants are listed in Table S1.

670

## 671 **Bone Marrow-derived Macrophage (BMDMs), Eosinophil (BMDEs) or Neutrophil 672 (BMDNs) isolation and culture.**

673 Murine Bone Marrow-Derived Macrophages (BMDMs) from bone marrow progenitors  
674 were differentiated in DMEM (Invitrogen) supplemented with 10% v/v FCS (Thermo  
675 Fisher Scientific), 10% v/v MCSF (L929 cell supernatant), 10 mM HEPES  
676 (Invitrogen), and nonessential amino acids (Invitrogen) for 7 days as previously  
677 described (Eren et al., 2020).

678 Murine Bone Marrow-Derived Eosinophils were differentiated *in-vitro* from bone  
679 marrow as previously described (Dyer et al., 2008). cells were resuspended and  
680 cultured at 10<sup>6</sup>/mL in RPMI glutamax medium with HEPES containing 20% FBS, 100  
681 IU/ml penicillin and 10  $\mu$ g/ml streptomycin, 1 mM sodium pyruvate (Life  
682 Technologies), and 50  $\mu$ M 2-ME (Sigma-Aldrich) supplemented with 100 ng/ml stem  
683 cell factor (SCF; PeproTech) and 100 ng/ml FLT3 ligand (FLT3-L; PeproTech) from  
684 days 0 to 4. On day 4, the medium containing SCF and FLT3-L was replaced with

685 medium containing 10 ng/ml recombinant mouse (rm) IL-5 (R&D Systems) only.  
686 Medium was replaced every 4 days and the concentration of the cells was adjusted  
687 each time to  $10^6$ /ml. After 10 to 14 days of culture, cells were recovered by gentle  
688 pipetting and used as Eosinophils in our experiments. Over 95% of cells had the  
689 standard phenotype of Eosinophils : CD11b+ Siglec F + after FACS analysis.

690 Murine Bone Marrow-derived Neutrophils were isolated and purified from fresh bone  
691 marrows using Anti-Ly-6G micro bead kit (Miltenyi Biotec). Analysis of cell purity by  
692 FACS show that over 95% of cells had the standard phenotype of Neutrophils  
693 Ly6G+/Ly6C+.

694  $2.5 \times 10^5$  BMDMs or  $1.10^6$  BMDEs/BMDNs were seeded in 24 well-plates and infected  
695 or exposed to various treatments. Regarding ferroptosis experiments, BMDMs were  
696 infected with various bacterial strains of *P. aeruginosa* expressing or not *exoU* at an  
697 MOI 0.1-1 for various times. When specified, recombinant microbial phospholipases  
698 (10ng-1 $\mu$ g) were transfected in BMDMs using Fugene (3 $\mu$ l per 1 $\mu$ g of transfected  
699 protein) for 2-4 hours. Compound-induced ferroptosis was achieved using RSL-3  
700 (10 $\mu$ M, 8H) or Cumene hydroperoxide (CuOOH, 500 $\mu$ M, 3H).

701 When required, BMDMs were pretreated for 2 hours with pharmacological inhibitors  
702 necrostatin-1s (40 $\mu$ M), Z-VAD (40 $\mu$ M), olaparib (10 $\mu$ M), ferrostatin-1 (1-40 $\mu$ M),  
703 MAFP (50 $\mu$ M), liproxstatin (30 $\mu$ M),  $\alpha$ -tocopherol (20 $\mu$ M).

704 For all stimulations, cell culture medium was replaced by serum-free and antibiotic-  
705 free Opti-MEM medium and triggers were added to the cells for various times.

706

## 707 **Cell line culture**

708 Immortalized murine bone-marrow derived macrophages have been described  
709 previously (Eren et al., 2020). U937 cells were cultured in RPMI glutamax medium  
710 containing 10% FBS, 100 IU/ml penicillin and 10  $\mu$ g/ml streptomycin, 1 mM sodium  
711 pyruvate (Life Technologies), and 50  $\mu$ M 2-ME (Sigma-Aldrich). Medium was  
712 renewed every 3 days and the concentration of the cells was adjusted each time to  
713  $5 \times 10^5$ /ml. A549, HeLa and HBE cells were cultured in DMEM glutamax medium with  
714 HEPES containing 10% FBS, 100 IU/ml penicillin and 10  $\mu$ g/ml streptomycin, 1 mM  
715 sodium pyruvate (Life Technologies). When the cells reach approximately 90%

716 confluency, cells are detached with Trypsin 0.05% (Gibco), cell suspension is diluted  
717 1/10 in fresh medium, and placed back in the incubator for culture.

718

719

720

## 721 **Purification and generation of human blood neutrophils and monocyte-derived** 722 **Macrophages**

723 Monocytes were isolated from Peripheral Blood Mononuclear Cells (PBMCs) from the  
724 buffy coat of healthy donors obtained from the EFS Toulouse Purpan (France) as  
725 described previously (Troegeler et al., 2014). Briefly, PBMCs were isolated by  
726 centrifugation using standard Ficoll-Paque density (GE Healthcare) (Eren et al.,  
727 2020). The blood was diluted 1:1 in phosphate-buffered saline (PBS) pre-warmed to  
728 37°C and carefully layered over the Ficoll-Paque gradient. The tubes were  
729 centrifuged for 25 min at 2000 rpm, at 20°C. The cell interface layer was harvested  
730 carefully, and the cells were washed twice in PBS (for 10 min at 1200 rpm followed  
731 by 10 min at 800 rpm) and re-suspended in RPMI-1640 supplemented with 10% of  
732 foetal calf serum (FCS), 1% penicillin (100 IU/mL) and streptomycin (100 µg/ml).  
733 Monocytes were separated from lymphocytes by positive selection using CD14+  
734 isolation kit (Mytenyi biotec). To allow differentiation into monocyte-derived  
735 macrophages, cells were cultured in RPMI medium (GIBCO) supplemented with 10%  
736 FCS (Invitrogen), 100 IU/ml penicillin, 100µg/ml streptomycin, 10 ng/ml M-CSF for 7  
737 days.

738 Human blood neutrophils were isolated from whole blood of healthy donors obtained  
739 from the EFS Toulouse Purpan (France). Neutrophils were enriched using  
740 MACSxpress Whole Blood Neutrophil Isolation Kit whole blood neutrophil isolation kit  
741 (Mytenyi biotec) according to manufacturer instructions. Red blood cells (RBC) were  
742 removed by 10 min incubation in RBC Lysis Buffer (BioLegend).

743

## 744 **Genetic invalidation of *Gpx4* genes in immortalized BMDMs**

745 Targeted genes were knocked-out using the crispr/cas9 system in immortalized  
746 BMDMs. Single guide RNAs (sgRNA) specifically targeting *Gpx4* exon1 (for 5'  
747 GGACGCTGCAGACAGCGCGG 3' were designed using Benchling tool  
748 (Benchling.com), and oligonucleotides were synthesized by Sigma-Aldrich. Crispr  
749 guide RNA oligonucleotides were hybridized and subsequently cloned into the vector  
750 Lenti-gRNA-Puromycin using BsmBI restriction enzyme (Addgene 52963, Feng  
751 Zhang lab). Generated constructs were then transfected in lipofectamine 2000 into  
752 HEK293T for 48 hours together with the lentiviral packaging vector p8.91 (Didier  
753 Trono lab, EPFL, Switzerland) and the envelop coding VSVg plasmid (pMD.2G,  
754 Addgene 12259, Didier Trono lab). Viral supernatants were harvested, filtered on  
755 0.45 µm filter and used to infect cells expressing Cas9 (1,000,000 cells/well in 6-well  
756 plates. Efficient infection viral particles was ensured by centrifugating cells for 2 h at  
757 2900 rpm at 32°C in presence of 8µg/ml polybrene. 48 h later, medium was replaced  
758 and Puromycin selection (10µg/mL) was applied to select positive clones for two  
759 weeks. Puromycin-resistant cells were sorted at the single cell level by FACS (Aria  
760 cell sorter). Individual clones were subjected to western blotting to confirm the  
761 absence of targeted proteins.

762

### 763 **Human bronchial organoid production and maintenance**

764 Airway organoids were derived from lung biopsies as described (Bartfeld and  
765 Clevers, 2015; Sachs et al., 2019). Briefly, Human lung tissue was provided by the  
766 CHU of Toulouse under the CNRS approved protocols CHU 19 244 C and CNRS  
767 205782. All patients participating in this study consented to scientific use of their  
768 material. Biopsies (1 mm<sup>3</sup>) of normal lung tissue adjacent to the tumor obtained from  
769 patients who underwent lung resection due to Non-small cell lung carcinoma  
770 (NSCLC) were minced and digested with 2 mg ml<sup>-1</sup> collagenase (Sigma) on an  
771 orbital shaker at 37°C for 1h. The digested tissue suspension was sheared using  
772 flamed glass Pasteur pipettes and strained over a 100-µm cell strainer (Falcon). The  
773 resultant single cell suspensions were embedded in 10 mg ml<sup>-1</sup> of Cultrex growth  
774 factor reduced BME type 2 (R & D Systems) and 40µl drops were seeded on  
775 Nunclon Delta surface 24-well plates (Thermo Scientific). Following polymerization,  
776 500 µl of Advanced DMEM/F12 (Invitrogen) supplemented with 1x L-Glutamine



777 (Fisher Scientific), 10mM HEPES (Fisher Scientific), 100 U ml<sup>-1</sup> / 100 µg ml<sup>-1</sup>  
778 Penicillin / Streptomycin (Fisher Scientific), 50 µg ml<sup>-1</sup> Primocin (InvivoGen), 10%  
779 Noggin (homemade), 10% Rspol (homemade), 1x B27 (Gibco), 1.25mM N-  
780 Acetylcysteine (Sigma-Aldrich), 10mM Nicotinamide (Sigma-Aldrich), 5µM Y-27632  
781 (Cayman Chemical), 500nM A83-01 (Tocris Bioscience), 1µM SB 202190 (Sigma-  
782 Aldrich), 25 ng ml<sup>-1</sup> FGF-7 (PeproTech), 100 ng ml<sup>-1</sup> FGF-10 (PeproTech) was  
783 added to each well and plates transferred to humidified incubator at 37°C with 5%  
784 CO<sub>2</sub>. The organoids were passaged every 4 weeks.

785

786

### 787 **Organoid infections**

788 Before infection, 35µl drops of Matrigel (Fisher Scientific) containing organoids were  
789 seeded on Nunclon Delta surface 35x10mm Dish (Thermo Scientific) and 2ml of  
790 Advanced DMEM/F12 supplemented with 1x L-Glutamine and 10mM HEPES was  
791 added to each plate. Depending on the indicated conditions, organoids were  
792 pretreated or not with 40µM Ferrostatin-1 for 1hr before infection. Ferrostatin-1 was  
793 maintained throughout the experiment. PP34 *exoU* or *exoU*<sup>S142A</sup> were grown as  
794 previously described until reach OD<sub>600</sub> = 1. Bacterial density was adjusted to OD<sub>600</sub>  
795 = 0.0005, and phenol red added at 0.005% to visualize successful microinjection (2).  
796 Injected organoids were individually collected and re-seeded into fresh matrix for  
797 subsequent analysis. For time-lapse imaging, injected and stimulated organoids were  
798 stained with 50 µg ml<sup>-1</sup> Propidium Iodide (Thermo Scientific). Images were acquired  
799 every 15 minutes for the duration of experiments under an EVOS M7000 (Thermo  
800 Scientific) Imaging System (10x, at 37°C with 5% CO<sub>2</sub>). Data was analyzed using  
801 Fiji/ImageJ.

802

### 803 **Cell necrosis, alarmin/cytokine and lipid release assays**

804 LDH Cytotoxicity Detection Kit (Takara) was used to determine the percentage of cell  
805 lysis. Normalization of spontaneous lysis was calculated as follows: (LDH infected –  
806 LDH uninfected)/(LDH total lysis – LDH uninfected)\*100.

807 Murine IL-1 $\alpha$ , IL-33, IL-36 $\alpha$ , IL-36 $\gamma$ , HMGB1, TNF $\alpha$ , cytokine levels in cell  
808 supernatants or in BALFs were measured by ELISA listed in resource Table 1.

809 Oxidized lipids isoprostanes, eicosanoids PGE2 and LTB4 were detected in cellular  
810 supernatants or BALFs using EIA kits listed in resource Table 1.

811

### 812 **Plasma membrane permeabilization assays**

813 Cells are plated at density of  $1 \times 10^5$  per well in 96-well Plates or at  $2 \times 10^5$ /well in 24-  
814 well plates (Corning 356640) in complete culture medium. The following day, medium  
815 is replaced by Opti-MEM supplemented with Propidium iodide (100 ng/ml) or SYTOX  
816 green (100ng/mL). Pharmacological inhibitors are added 1h before infection. Red  
817 (Propidium Iodide) or green (SYTOX) fluorescence are measured in real-time using  
818 Clariostar plate reader or an EVOS7000 microscope, both equipped with a 37°C cell  
819 incubator.

820

### 821 **Malondialdehyde (MDA) assays**

822 Malondialdehyde production was addressed using the MDA lipid peroxidation kit  
823 according to the manufacturer's instructions (Abcam, ab118970). Cells were lysed  
824 using 500  $\mu$ l of lysis buffer supplemented with butylated hydroxytoluene. Cell lysates  
825 were centrifuged for 10 min at 13,000 g (RCF) and the supernatants were used for  
826 MDA assay. TBA solution was added to each replicate, and samples were then  
827 incubated at 95°C for 1 hour. 100 $\mu$ L of each sample was then processed for  
828 fluorometric assay at Ex/Em = 532/553 nm. BAL levels of MDA were normalized to  
829 the total protein concentration.

830

### 831 **Recombinant protein production**

832 Plasmids coding for *exoU*<sup>BtU</sup>, *exoU* or *exoU*<sup>S142A</sup> were a kind gift from Dara W.  
833 Frank's lab. All recombinant proteins were expressed in BL21(DE3) pLysS strain in  
834 LB medium, according to Anderson DM et al. (Anderson et al., 2015). Proteins fused  
835 with an N-terminus hexahistidine-tag were purified as previously described with slight  
836 modifications. Briefly, after cell harvest, bacteria were lysed by sonication under ice

837 and recombinant proteins were purified by nickel metal affinity chromatography  
838 (Takara). After sample concentration, Superose 6 was exchanged for a Superdex  
839 200 size exclusion column (GE Healthcare) as a final purification step. Samples were  
840 either used fresh or keep at -80°C for long-term storage.

841

#### 842 **Cytometry quantification of immune cells in mice BAL fluids (BALFs)**

843 C57BL/6 mice received an injection of Ferrostatine (6mg/kg) or PBS as control  
844 intraperitoneally. 4-6h after, mice were infected by intranasal instillation of 50 µL of  
845 PBS containing or not  $5 \times 10^6$  bacteria (PP34) in presence or absence of Ferrostatine  
846 (6mg /kg). 18h after infection, BALFs were collected and quality/quantity of immune  
847 cells content was assayed by flow cytometry. Briefly, cells were pelleted (1000 rpm, 5  
848 minutes), Red blood cells (RBC) were removed by 10 min incubation in RBC Lysis  
849 Buffer (BioLegend), monocytes, macrophages, neutrophils, and eosinophils were  
850 subsequently stained with a cocktail of fluorochrome-conjugated antibodies detailed  
851 in the material section. Cells were then fixed in 4% PFA before fluorescence  
852 associated cell sorting (FACS) analysis using a LSRII instrument. AccuCheck  
853 Counting Beads (ThermoFisher) were used to determine absolute cell number. Data  
854 analysis and processing were performed using FlowJO software.

855

#### 856 **Cytometry-based Lipid peroxidation or ROS production**

857 To measure lipid peroxidation or ROS production, cells were first washed with PBS  
858 1X, and then incubated with either C11-BODIPY(581/591) (ThermoFisher) at 2 µM,  
859 or H2DCFDA (ThermoFisher) at 10 µM in Opti-MEM medium for 30 min at 37°C.  
860 After three washes with PBS 1X cells are resuspended in Opti-MEM medium and  
861 infected in presence or absence of pharmacological inhibitors. After 1-3h of infection,  
862 cells are washed with PBS, detached in MACS buffer (PBS-BSA 0,5%-EDTA 2mM)  
863 and samples were acquired within one hour using a flow cytometer (BD FORTRESSA  
864 LSR II). Data were analysed with FlowJO software (version 10).

865

#### 866 **Immunoblotting**

867 Cell lysate generation has been described previously (Eren et al., 2020). Briefly,  
868 proteins were loaded in 12% SDS-PAGE gels and then transferred on PVDF  
869 membranes. After saturation for 1 hour in Tris-buffered saline (TBS) supplemented  
870 with 0.05% Tween 20 containing 5% non-fat milk (pH8), membranes were exposed  
871 with antibodies at 4°C overnight (Table 1). Next day, membranes were washed 3  
872 times in TBS 0.1% Tween 20 and incubated with the corresponding secondary  
873 antibodies conjugated to horseradish peroxidase (HRP) (Table 1) for 1h at room  
874 temperature. Immunoblottings were revealed using a chemiluminescent substrate  
875 ECL substrate (Biorad) and images were acquired on a ChemiDoc Imaging System  
876 (Biorad). All antibodies and their working concentrations are listed in Table 1.

877

878

### 879 **(Redox) lipidomic**

880 1 million bone-marrow-derived macrophages were seeded into 6-well plates. Next  
881 day, BMDMs were transfected with recombinant ExoU or ExoU<sup>S142A</sup> proteins  
882 (500ng/well) for one hour. Then, supernatant was removed, cells were washed two  
883 times in PBS. Finally, 500µL of a cold solution of 50% PBS/50% Methanol was added  
884 to cells and samples were transferred to -80°C for storage and subsequent analyses.

885 After thawing, lipids were extracted using a methyl-tert-butyl ether (MTBE)-based  
886 liquid-liquid extraction method. Cell suspensions (500 µL in PBS/methanol 1:1, v/v)  
887 were thawed on ice before adding 100 µL methanol MeOH containing 50 ng each of  
888 the internal standards PC(15:0/18:1-d7), PE(15:0/18:1- d7), PG(15:0/18:1-d7),  
889 PI(15:0/18:1-d7) and PS(15:0/18:1-d7) (EquiSPLASH, Avanti Polar Lipids). Samples  
890 were then transferred into 8-mL screw-cap tubes, and then 1.125 methanol and 5 mL  
891 MTBE were added. After vigorous mixing, samples were incubated at room  
892 temperature on a tabletop shaker for 45 min. For phase separation, 1.25 mL water  
893 was added, and samples were vortexed and centrifuged for 15 min at 2000 x g. The  
894 upper organic phase of each sample was carefully removed using a Pasteur pipette,  
895 transferred into an empty glass round-bottom tube, and dried under vacuum in a  
896 SpeedVac concentrator. The dried lipid extracts were resuspended in 200 µL HPLC  
897 mobile phase A/mobile phase B 3:1 (v/v) for targeted lipidomic analysis of oxidized  
898 phospholipids. For LC-MS/MS, using a Sciex ExionLC Integrated System, 20 µL of

899 each lipid extract was injected using Column Kinetex 2.6  $\mu\text{m}$  HILIC 100  $\text{\AA}$  100x2.1  
900 mm, Phenomenex and a Flow Rate of 200  $\mu\text{L}/\text{min}$ . Then, the analyte-specific m/z  
901 transition profile was determined and the area under the peak (ion intensity vs.  
902 elution time) was calculated using MultiQuant, Sciex software.

903 Data calculation was performed by doing ratio between the values of “area ratio  
904 analyte/internal standard” of each oxidized phospholipid and its non-oxidized  
905 phospholipid. The fold induction in oxidized phospholipid was then calculated by  
906 doing a ratio between each oxidized ratio and the non-stimulated condition.  
907 Accordingly, the unstimulated condition oxidized ratios were 1 or 0 when no  
908 peroxidation was detected in any condition.

909

910

#### 911 **Phospholipase activity measurement**

912 Evaluation of ExoU phospholipase activity was performed using the Cayman  
913 Chemical cPLA2 kit and performed as previously described with minor modifications  
914 (Deruelle et al., 2020). Briefly, 10  $\mu\text{L}$  of a 1mg/mL (160pmols) solution of recombinant  
915 ExoU or ExoU<sup>S142</sup> proteins were mixed in 96-well plates with 10 $\mu\text{L}$  of lysed cell  
916 samples and 10 $\mu\text{L}$  of Assay Buffer. Then, samples were incubated for 1 hour at room  
917 temperature with 250 $\mu\text{L}$  of substrate solution (1.5 mM arachidonyl  
918 thiophosphatidylcholine) and then for additional 4 or 16 hours in dark. Reaction was  
919 stopped using 25mM solution of DTNB according to manufacturer instructions and  
920 absorbance was detected at 405nm using a Clariostar plate reader. Phospholipase  
921 activity of ExoU or ExoU<sup>S142</sup> was calculated as the hydrolysis rate accordingly to the  
922 manufacturer instructions.

923

#### 924 **Ethics statements**

925 The use of human cells was performed under the agreement of the Research Ethical  
926 Committee, Haute-Garonne, France. Buffy coats came anonymously by the EFS  
927 (établissement français du sang, Toulouse, France). For each donor, a written  
928 informed consent was obtained according to the EFS contract agreement n°

929 21PLER2017-0035AV02, according, to “Decret N° 2007-1220 (articles L1243-4,  
930 R1243-61)”.

931

### 932 **Statistical analysis**

933 Statistical data analysis was performed using Prism 8.0a (GraphPad Software, Inc.).  
934 We used T-test with Bonferroni correction for comparison of two groups. Data are  
935 reported as mean with SEM. Regarding animal experiments, we used Mann-Whitney  
936 tests and mouse survival analysis were done using log-rank Cox-Mantel test. P  
937 values in figures have the following meaning; NS non-significant and Significance is  
938 specified as \* $p \leq 0.05$ ; \*\* $p \leq 0.01$ , \*\*\* $p \leq 0.001$ .

939

940

941

### 942 **Supplemental information**

943

#### 944 **Figure S1: ExoU-dependent lung pathology in mice occurs in an** 945 **inflammasome-independent manner**

946 **(A)** Survival of WT, *Casp1<sup>-/-</sup>/Casp11<sup>-/-</sup>*, *Nlr4<sup>-/-</sup>* and *GsdmD<sup>-/-</sup>* mice intranasally  
947 infected (n=6 animals per condition) with  $5 \cdot 10^5$  CFUs of *P. aeruginosa* PP34. Graphs  
948 represent one experiment (6 mice/group) out of three independent *in vivo*  
949 experiments. NS: Not significant using Log-rank Cox-Mantel test for survival  
950 comparisons.

951 **(B)** Bronchoalveolar (BAL) and lung bacterial loads from WT, *Casp1<sup>-/-</sup>/Casp11<sup>-/-</sup>*,  
952 *Nlr4<sup>-/-</sup>* and *GsdmD<sup>-/-</sup>* mice (n=6) 18 hours after intranasal infection with  $5 \cdot 10^5$  CFUs  
953 of *P. aeruginosa* PP34. Graphs represent one experiment (6 mice/group) out of three  
954 independent *in vivo* experiments. NS: Not significant using Mann-Whitney analysis  
955 test.

956

957 **Figure S2: Lipid peroxidation contributes to ExoU-induced necrosis in various**  
958 **cell types**

959 **(A)** LDH release in *Nlr4*<sup>-/-</sup> BMDMs infected with various *P. aeruginosa* strains  
960 expressing or not *exoU* in presence of Ferrostatin-1 (Fe1, 10μM) for 2 hours.

961 **(B)** Measure of LDH release in various human and murine cell types infected with  
962 various *P. aeruginosa* strains expressing or not *exoU* in presence of Ferrostatin-1  
963 (Fe1, 10μM) for 2 hours.

964 **(C)** Immunoblotting of ExoU secretion by *P. aeruginosa* in presence of ferrostatin-1  
965 (20μM).

966 **(D)** Measure of bacterial growth (O.D 600) in presence or absence of ferrostatin-1  
967 (10, 20μM) for 14 hours)

968

969 **Figure S3: Lipid peroxidation fuels ExoU-dependent necrosis**

970 **(A)** ROS production in WT BMDMs transfected with ExoU or its catalytically dead  
971 mutant ExoU<sup>S142A</sup> for 45 minutes using H2DCFDA (1μM) probe.

972 **(B)** Lipidomic analysis of the relative amount of each phospholipid upon rExoU  
973 transfection analysed in **Figure 3B**.

974 **(C)** Representative microscopy images of propidium iodide uptake in WT BMDMs  
975 transfected with rExoU or its catalytically inactive mutant ExoU<sup>S142A</sup> (500ng). Images  
976 show two independent experiments, each performed three times at 45 minutes or 3  
977 hours post transfection.

978 **(D)** Immunoblotting of Crispr Cas9-mediated *Gpx4* gene deletion in immortalized  
979 BMDMs. The Gpx4#1 (red) was selected for further analysis. CD8 and GFP means  
980 that cells were transduced with sgRNA targeting *Gfp* or *Cd8* genes and used as  
981 controls.

982 **(E)** Cytometry detection and quantification of phospholipid peroxidation using the  
983 probe C11-bodipy in immortalized WT or *Gpx4*<sup>-/-</sup> BMDMs using a fortessa cytometer.



984 **(F)** PGE2 and LTB4 eicosanoid release in WT BMDMs transfected with 100ng of  
985 ExoU or its catalytically dead mutant ExoU<sup>S142A</sup> for 3 hours in presence or absence of  
986 ferrostatin-1 (20μM).

987

988 **Figure S4: Ferrostatin-1 protects mice against ExoU-induced lung pathology**

989 **(A)** Gating strategy to analyse Immune cell populations in bronchoalveolar fluids  
990 (BALFs). Immune cells were identified as CD45+ cells. Among CD45+ cells, different  
991 subset of immune cells including Interstitial/Alveolar Macrophages, Eosinophils and  
992 Neutrophils are identified based on specific cell surface marker expression.

993

994 **Graphical abstract: Host lipid peroxidation fuels ExoU-induced cell necrosis-**  
995 **dependent pathology.** Upon injection into host target cells ExoU becomes hyper-  
996 activated by host cell peroxidised phospholipids, which drives an exacerbated cell  
997 necrosis and contributes to the subsequent pathology. Consequently, targeting lipid  
998 peroxidation (ferrostatin-1) inhibits ExoU-dependent cell necrosis and attenuates the  
999 host deleterious consequences.

1000

1001 **Movie S1: Live cell imaging of uninfected immortalized murine *Nlrc4*<sup>-/-</sup> BMDMs**  
1002 **cell death using SYTOX green. 1 “time point” corresponds to 150s.**

1003 **Movie S2: Live cell imaging of uninfected immortalized murine *Nlrc4*<sup>-/-</sup> BMDMs**  
1004 **cell death in presence of 20μM of ferrostatin-1 using SYTOX green. 1 “time**  
1005 **point” corresponds to 150s.**

1006 **Movie S3: Live cell imaging of immortalized murine *Nlrc4*<sup>-/-</sup> BMDMs cell death**  
1007 **infected with *exoU*-expressing *P. aeruginosa* (MOI1) using SYTOX green. 1**  
1008 **“time point” corresponds to 150s.**

1009 **Movie S4: Live cell imaging of immortalized murine *Nlrc4*<sup>-/-</sup> BMDMs cell death**  
1010 **infected with *exoU*-expressing *P. aeruginosa* (MOI1) in presence of ferrostatin-**  
1011 **1 (20μM) using SYTOX green. 1 “time point” corresponds to 150s.**

1012 **Movie S5: Live cell imaging of immortalized murine *Nlrc4*<sup>-/-</sup> BMDMs cell death**  
1013 **infected with *exoU*-deficient *P. aeruginosa* (MOI1) using SYTOX green. 1 “time**  
1014 **point” corresponds to 150s.**

1015 **Movie S6: Live cell imaging of immortalized murine *Nlrc4*<sup>-/-</sup> BMDMs cell death**  
1016 **infected with *exoU*-deficient *P. aeruginosa* (MOI1) in presence of ferrostatin-1**  
1017 **(20μM) using SYTOX green. 1 “time point” corresponds to 150s.**

1018 **Movie S7: Live cell imaging of uninfected human bronchial organoids using**  
1019 **Propidium Iodide up to 12 hours.**

1020 **Movie S8: Live cell imaging of uninfected human bronchial organoids in**  
1021 **presence of ferrostatin-1 (40μM) using Propidium Iodide up to 12 hours.**

1022 **Movie S9: Live cell imaging of human bronchial organoids microinjected with**  
1023 ***exoU*-expressing *P. aeruginosa* using Propidium Iodide up to 12 hours.**

1024 **Movie S10: Live cell imaging of human bronchial organoids microinjected with**  
1025 ***exoU*-expressing *P. aeruginosa* in presence of ferrostatin-1 (40μM) using**  
1026 **Propidium Iodide up to 12 hours.**

1027 **Movie S11: Live cell imaging of human bronchial organoids microinjected with**  
1028 ***exoU*-deficient *P. aeruginosa* using Propidium Iodide up to 12 hours.**

1029 **Movie S12: Live cell imaging of human bronchial organoids microinjected with**  
1030 ***exoU*-deficient *P. aeruginosa* in presence of ferrostatin-1 (40μM) using**  
1031 **Propidium Iodide up to 12 hours.**

1032

1033

1034

1035

1036

1037

1038

1039

1040

1041

1042

1043

1044

1045

1046

1047

1048

1049

1050

1051

1052

1053

1054 **References**

1055 Amaral, E.P., Costa, D.L., Namasivayam, S., Riteau, N., Kamenyeva, O., Mittereder,  
1056 L., Mayer-Barber, K.D., Andrade, B.B., and Sher, A. (2019). A major role for  
1057 ferroptosis in *Mycobacterium tuberculosis*–induced cell death and tissue necrosis. *J.*  
1058 *Exp. Med.* *216*, 556–570.

1059 Anderson, D.M., Sato, H., Dirck, A.T., Feix, J.B., and Frank, D.W. (2015). Ubiquitin  
1060 activates patatin-like phospholipases from multiple bacterial species. *J. Bacteriol.*  
1061 *197*, 529–541.

1062 Aoyagi, T., Newstead, M.W., Zeng, X., Nanjo, Y., Peters-Golden, M., Kaku, M., and  
1063 Standiford, T.J. (2017). Interleukin-36 $\gamma$  and IL-36 receptor signaling mediate impaired  
1064 host immunity and lung injury in cytotoxic *Pseudomonas aeruginosa* pulmonary  
1065 infection: Role of prostaglandin E2. *PLoS Pathog.* *13*.

1066 Balakrishnan, A., Karki, R., Berwin, B., Yamamoto, M., and Kanneganti, T.-D. (2018).

- 1067 Guanylate binding proteins facilitate caspase-11-dependent pyroptosis in response to  
1068 type 3 secretion system-negative *Pseudomonas aeruginosa*. *Cell Death Discov.* **4**,  
1069 66.
- 1070 Bartfeld, S., and Clevers, H. (2015). Organoids as model for infectious diseases:  
1071 Culture of human and murine stomach organoids and microinjection of helicobacter  
1072 pylori. *J. Vis. Exp.* **2015**.
- 1073 Beatty, A., Singh, T., Tyurina, Y.Y., Nicolas, E., Maslar, K., Zhou, Y., Cai, K.Q., Tan,  
1074 Y., Doll, S., Conrad, M., et al. Conjugated linolenic fatty acids trigger ferroptosis in  
1075 triple-negative breast cancer.
- 1076 Bedoui, S., Herold, M.J., and Strasser, A. (2020). Emerging connectivity of  
1077 programmed cell death pathways and its physiological implications. *Nat. Rev. Mol.*  
1078 *Cell Biol.* **21**, 678–695.
- 1079 Beharier, O., Tyurin, V.A., Goff, J.P., Guerrero-Santoro, J., Kajiwara, K., Chu, T.,  
1080 Tyurina, Y.Y., St Croix, C.M., Wallace, C.T., Parry, S., et al. (2020). PLA2G6 guards  
1081 placental trophoblasts against ferroptotic injury. *Proc. Natl. Acad. Sci. U. S. A.* **117**,  
1082 27319–27328.
- 1083 Bersuker, K., Hendricks, J.M., Li, Z., Magtanong, L., Ford, B., Tang, P.H., Roberts,  
1084 M.A., Tong, B., Maimone, T.J., Zoncu, R., et al. (2019). The CoQ oxidoreductase  
1085 FSP1 acts parallel to GPX4 to inhibit ferroptosis. *Nature* **575**, 688–692.
- 1086 Bitto, N.J., Baker, P.J., Dowling, J.K., Wray-McCann, G., De Paoli, A., Tran, L.S.,  
1087 Leung, P.L., Stacey, K.J., Mansell, A., Masters, S.L., et al. (2018). Membrane  
1088 vesicles from *Pseudomonas aeruginosa* activate the noncanonical inflammasome  
1089 through caspase-5 in human monocytes. *Immunol. Cell Biol.* **96**, 1120–1130.
- 1090 Bochkov, V.N., Oskolkova, O. V., Birukov, K.G., Levonen, A.L., Binder, C.J., and  
1091 Stöckl, J. (2010). Generation and biological activities of oxidized phospholipids.  
1092 *Antioxidants Redox Signal.* **12**, 1009–1059.
- 1093 Bogacz, M., and Krauth-Siegel, R.L. (2018). Tryparedoxin peroxidase-deficiency  
1094 commits trypanosomes to ferroptosis-type cell death. *Elife* **7**.
- 1095 Cayrol, C., Duval, A., Schmitt, P., Roga, S., Camus, M., Stella, A., Burlet-Schiltz, O.,  
1096 Gonzalez-De-Peredo, A., and Girard, J.P. (2018). Environmental allergens induce

- 1097 allergic inflammation through proteolytic maturation of IL-33. *Nat. Immunol.* *19*, 375–  
1098 385.
- 1099 Cohen, T.S., and Prince, A.S. (2013). Activation of inflammasome signaling mediates  
1100 pathology of acute *P. aeruginosa* pneumonia. *J. Clin. Invest.* *123*, 1630–1637.
- 1101 Conrad, M., and Pratt, D.A. (2019). The chemical basis of ferroptosis. *Nat. Chem.*  
1102 *Biol.* *15*, 1137–1147.
- 1103 Conrad, M., Kagan, V.E., Bayir, H., Pagnussat, G.C., Head, B., Traber, M.G., and  
1104 Stockwell, B.R. (2018). Regulation of lipid peroxidation and ferroptosis in diverse  
1105 species. *Genes Dev.* *32*, 602–619.
- 1106 da Cunha, L.G., Ferreira, M.F., de Moraes, J.A., Reis, P.A., Castro-Faria-Neto, H.C.,  
1107 Barja-Fidalgo, C., Plotkowski, M.C., and Saliba, A.M. (2015). ExoU-induced redox  
1108 imbalance and oxidative stress in airway epithelial cells during *Pseudomonas*  
1109 *aeruginosa* pneumosepsis. *Med. Microbiol. Immunol.* *204*, 673–680.
- 1110 Dar, H.H., Tyurina, Y.Y., Mikulska-Ruminska, K., Shrivastava, I., Ting, H.C., Tyurin,  
1111 V.A., Krieger, J., Croix, C.M.S., Watkins, S., Bayir, E., et al. (2018). *Pseudomonas*  
1112 *aeruginosa* utilizes host polyunsaturated phosphatidylethanolamines to trigger theft-  
1113 ferroptosis in bronchial epithelium. *J. Clin. Invest.* *128*, 4639–4653.
- 1114 Demarco, B., Grayczyk, J.P., Bjanec, E., Roy, D. Le, Tonnus, W., Assenmacher,  
1115 C.A., Radaelli, E., Fettlelet, T., Mack, V., Linkermann, A., et al. (2020). Caspase-8-  
1116 dependent gasdermin D cleavage promotes antimicrobial defense but confers  
1117 susceptibility to TNF-induced lethality. *Sci. Adv.* *6*, 3465–3483.
- 1118 Deruelle, V., Bouillot, S., Job, V., Taillebourg, E., Fauvarque, M.-O., Attrée, I., and  
1119 Huber, P. (2020). The bacterial toxin ExoU requires a host trafficking chaperone for  
1120 transportation and to induce necrosis. *BioRxiv* 2020.11.04.367706.
- 1121 Dessen, A. (2000). Phospholipase A2 enzymes: Structural diversity in lipid  
1122 messenger metabolism. *Structure* *8*, R15–R22.
- 1123 Diaz, M.H., and Hauser, A.R. (2010). *Pseudomonas aeruginosa* cytotoxin ExoU is  
1124 injected into phagocytic cells during acute pneumonia. *Infect. Immun.* *78*, 1447–  
1125 1456.
- 1126 Dixon, S.J., Lemberg, K.M., Lamprecht, M.R., Skouta, R., Zaitsev, E.M., Gleason,

- 1127 C.E., Patel, D.N., Bauer, A.J., Cantley, A.M., Yang, W.S., et al. (2012). Ferroptosis:  
1128 An iron-dependent form of nonapoptotic cell death. *Cell* 149, 1060–1072.
- 1129 Doll, S., Proneth, B., Tyurina, Y.Y., Panzilius, E., Kobayashi, S., Ingold, I., Irmeler, M.,  
1130 Beckers, J., Aichler, M., Walch, A., et al. (2017). ACSL4 dictates ferroptosis  
1131 sensitivity by shaping cellular lipid composition. *Nat. Chem. Biol.* 13, 91–98.
- 1132 Doll, S., Freitas, F.P., Shah, R., Aldrovandi, M., da Silva, M.C., Ingold, I., Grocin,  
1133 A.G., Xavier da Silva, T.N., Panzilius, E., Scheel, C.H., et al. (2019). FSP1 is a  
1134 glutathione-independent ferroptosis suppressor. *Nature* 575, 693–698.
- 1135 Dyer, K.D., Moser, J.M., Czapiga, M., Siegel, S.J., Percopo, C.M., and Rosenberg,  
1136 H.F. (2008). Functionally Competent Eosinophils Differentiated Ex Vivo in High Purity  
1137 from Normal Mouse Bone Marrow. *J. Immunol.* 181, 4004–4009.
- 1138 Eren, E., Planès, R., Buyck, J., Bordignon, P.-J., Colom, A., Cunrath, O., Dreier, R.,  
1139 Santos, J., Duplan-Eche, V., Näser, E., et al. (2019). Type-3 Secretion System–  
1140 induced pyroptosis protects *Pseudomonas* against cell-autonomous immunity.  
1141 *BioRxiv* 650333.
- 1142 Eren, E., Planès, R., Bagayoko, S., Bordignon, P., Chaoui, K., Hessel, A., Santoni,  
1143 K., Pinilla, M., Lagrange, B., Bulet-Schiltz, O., et al. (2020). *Irgm2* and *Gate-16*  
1144 cooperatively dampen Gram-negative bacteria-induced caspase-11 response. *EMBO*  
1145 *Rep.* 21.
- 1146 Faure, E., Mear, J.B., Faure, K., Normand, S., Couturier-Maillard, A., Grandjean, T.,  
1147 Balloy, V., Ryffel, B., Dessein, R., Chignard, M., et al. (2014). *Pseudomonas*  
1148 *aeruginosa* type-3 secretion system dampens host defense by exploiting the NLRC4-  
1149 coupled inflammasome. *Am. J. Respir. Crit. Care Med.* 189, 799–811.
- 1150 Flores-Díaz, M., Monturiol-Gross, L., Naylor, C., Alape-Girón, A., and Flieger, A.  
1151 (2016). Bacterial Sphingomyelinases and Phospholipases as Virulence Factors.  
1152 *Microbiol. Mol. Biol. Rev.* 80, 597–628.
- 1153 Franchi, L., Stoolman, J., Kanneganti, T.D., Verma, A., Ramphal, R., and Núñez, G.  
1154 (2007). Critical role for *Ipaf* in *Pseudomonas aeruginosa*-induced caspase-1  
1155 activation. *Eur. J. Immunol.* 37, 3030–3039.
- 1156 Friedmann Angeli, J.P., Schneider, M., Proneth, B., Tyurina, Y.Y., Tyurin, V.A.,

- 1157 Hammond, V.J., Herbach, N., Aichler, M., Walch, A., Eggenhofer, E., et al. (2014).  
1158 Inactivation of the ferroptosis regulator Gpx4 triggers acute renal failure in mice. *Nat.*  
1159 *Cell Biol.* *16*, 1180–1191.
- 1160 Galluzzi, L., Vitale, I., Aaronson, S.A., Abrams, J.M., Adam, D., Agostinis, P.,  
1161 Alnemri, E.S., Altucci, L., Amelio, I., Andrews, D.W., et al. (2018). Molecular  
1162 mechanisms of cell death: Recommendations of the Nomenclature Committee on  
1163 Cell Death 2018. *Cell Death Differ.* *25*, 486–541.
- 1164 Gendrin, C., Contreras-Martel, C., Bouillot, S., Elsen, S., Lemaire, D., Skoufias, D.A.,  
1165 Huber, P., Attree, I., and Dessen, A. (2012). Structural Basis of Cytotoxicity Mediated  
1166 by the Type III Secretion Toxin ExoU from *Pseudomonas aeruginosa*. *PLoS Pathog.*  
1167 *8*, e1002637.
- 1168 Hiu, J.J., and Yap, M.K.K. (2020). Cytotoxicity of snake venom enzymatic toxins:  
1169 Phospholipase A2 and L-amino acid oxidase. *Biochem. Soc. Trans.* *48*, 719–731.
- 1170 Howell, H.A., Logan, L.K., and Hauser, A.R. (2013). Type III secretion of ExoU is  
1171 critical during early *Pseudomonas aeruginosa* Pneumonia. *MBio* *4*.
- 1172 Iannitti, R.G., Napolioni, V., Oikonomou, V., De Luca, A., Galosi, C., Pariano, M.,  
1173 Massi-Benedetti, C., Borghi, M., Puccetti, M., Lucidi, V., et al. (2016). IL-1 receptor  
1174 antagonist ameliorates inflammasome-dependent inflammation in murine and human  
1175 cystic fibrosis. *Nat. Commun.* *7*, 1–16.
- 1176 Jenkins, N.L., James, S.A., Salim, A., Sumardy, F., Speed, T.P., Conrad, M.,  
1177 Richardson, D.R., Bush, A.I., and McColl, G. (2020). Changes in ferrous iron and  
1178 glutathione promote ferroptosis and frailty in aging *Caenorhabditis elegans*. *Elife* *9*, 1–  
1179 28.
- 1180 Kagan, V.E., Mao, G., Qu, F., Angeli, J.P.F., Doll, S., Croix, C.S., Dar, H.H., Liu, B.,  
1181 Tyurin, V.A., Ritov, V.B., et al. (2017). Oxidized arachidonic and adrenic PEs  
1182 navigate cells to ferroptosis. *Nat. Chem. Biol.* *13*, 81–90.
- 1183 Kain, H.S., Glennon, E.K.K., Vijayan, K., Arang, N., Douglass, A.N., Fortin, C.L.,  
1184 Zuck, M., Lewis, A.J., Whiteside, S.L., Dudgeon, D.R., et al. (2020). Liver stage  
1185 malaria infection is controlled by host regulators of lipid peroxidation. *Cell Death*  
1186 *Differ.* *27*, 44–54.



- 1187 Kinsey, G.R., Blum, J.L., Covington, M.D., Cummings, B.S., McHowat, J., and  
1188 Schnellmann, R.G. (2008). Decreased iPLA2 $\gamma$  expression induces lipid peroxidation  
1189 and cell death and sensitizes cells to oxidant-induced apoptosis. *J. Lipid Res.* *49*,  
1190 1477–1487.
- 1191 van Kuijk, F.J.G.M., Sevanian, A., Handelman, G.J., and Dratz, E.A. (1987). A new  
1192 role for phospholipase A2: protection of membranes from lipid peroxidation damage.  
1193 *Trends Biochem. Sci.* *12*, 31–34.
- 1194 Lefèvre, L., Authier, H., Stein, S., Majorel, C., Couderc, B., Dardenne, C., Eddine,  
1195 M.A., Meunier, E., Bernad, J., Valentin, A., et al. (2015). LRH-1 mediates anti-  
1196 inflammatory and antifungal phenotype of IL-13-activated macrophages through the  
1197 PPAR $\gamma$  ligand synthesis. *Nat. Commun.* *6*, 1–13.
- 1198 Li, N., Wang, W., Zhou, H., Wu, Q., Duan, M., Liu, C., Wu, H., Deng, W., Shen, D.,  
1199 and Tang, Q. (2020). Ferritinophagy-mediated ferroptosis is involved in sepsis-  
1200 induced cardiac injury. *Free Radic. Biol. Med.* *160*, 303–318.
- 1201 Li, P., Allen, H., Banerjee, S., Franklin, S., Herzog, L., Johnston, C., McDowell, J.,  
1202 Paskind, M., Rodman, L., Salfeld, J., et al. (1995). Mice deficient in IL-1 $\beta$ -converting  
1203 enzyme are defective in production of mature IL-1 $\beta$  and resistant to endotoxic shock.  
1204 *Cell* *80*, 401–411.
- 1205 Lovatt, M., Adnan, K., Kocaba, V., Dirisamer, M., Peh, G.S.L., and Mehta, J.S.  
1206 (2020). Peroxiredoxin-1 regulates lipid peroxidation in corneal endothelial cells.  
1207 *Redox Biol.* *30*, 101417.
- 1208 Lu, B., Chen, X. bing, Hong, Y. cai, Zhu, H., He, Q. jun, Yang, B., Ying, M. dan, and  
1209 Cao, J. (2019). Identification of PRDX6 as a regulator of ferroptosis. *Acta Pharmacol.*  
1210 *Sin.* *40*, 1334–1342.
- 1211 Machado, G.B., de Oliveira, A. V., Saliba, A.M., de Lima, C.D.M., Suassuna, J.H.R.,  
1212 and Plotkowski, M.C. (2011). *Pseudomonas aeruginosa* toxin ExoU induces a PAF-  
1213 dependent impairment of alveolar fibrin turnover secondary to enhanced activation of  
1214 coagulation and increased expression of plasminogen activator inhibitor-1 in the  
1215 course of mice pneumosepsis. *Respir. Res.* *12*, 104.
- 1216 Man, S.M., Hopkins, L.J., Nugent, E., Cox, S., Glück, I.M., Turlomousis, P., Wright,  
1217 J.A., Cicuta, P., Monie, T.P., and Bryant, C.E. (2014). Inflammasome activation

- 1218 causes dual recruitment of NLRC4 and NLRP3 to the same macromolecular  
1219 complex. *Proc. Natl. Acad. Sci. U. S. A.* *111*, 7403–7408.
- 1220 Meunier, E., and Neyrolles, O. (2019). Die another way: Ferroptosis drives  
1221 tuberculosis pathology. *J. Exp. Med.* *216*, 471–473.
- 1222 Miao, E.A., Ernst, R.K., Dors, M., Mao, D.P., and Aderem, A. (2008). *Pseudomonas*  
1223 *aeruginosa* activates caspase 1 through Ipaf. *Proc. Natl. Acad. Sci. U. S. A.* *105*,  
1224 2562–2567.
- 1225 Miyamoto, S., Dupas, C., Murota, K., and Terao, J. (2003). Phospholipid  
1226 hydroperoxides are detoxified by phospholipase A2 and GSH peroxidase in rat  
1227 gastric mucosa. *Lipids* *38*, 641–649.
- 1228 Al Moussawi, K., and Kazmierczak, B.I. (2014). Distinct contributions of interleukin-1 $\alpha$   
1229 (IL-1 $\alpha$ ) and IL-1 $\beta$  to innate immune recognition of *Pseudomonas aeruginosa* in the  
1230 lung. *Infect. Immun.* *82*, 4204–4211.
- 1231 Palm, N.W., Rosenstein, R.K., Yu, S., Schenten, D.D., Florsheim, E., and Medzhitov,  
1232 R. (2013). Bee venom phospholipase A2 induces a primary type 2 response that is  
1233 dependent on the receptor ST2 and confers protective immunity. *Immunity* *39*, 976–  
1234 985.
- 1235 Pazos, M.A., Lanter, B.B., Yonker, L.M., Eaton, A.D., Pirzai, W., Gronert, K.,  
1236 Bonventre, J. V., and Hurley, B.P. (2017). *Pseudomonas aeruginosa* ExoU augments  
1237 neutrophil transepithelial migration. *PLoS Pathog.* *13*.
- 1238 Phillips, R.M., Six, D.A., Dennis, E.A., and Ghosh, P. (2003). In Vivo Phospholipase  
1239 Activity of the *Pseudomonas aeruginosa* Cytotoxin ExoU and Protection of  
1240 Mammalian Cells with Phospholipase A2 Inhibitors. *J. Biol. Chem.* *278*, 41326–  
1241 41332.
- 1242 Place, D.E., Lee, S.J., and Kanneganti, T.D. (2021). PANoptosis in microbial  
1243 infection. *Curr. Opin. Microbiol.* *59*, 42–49.
- 1244 Rabin, S.D.P., and Hauser, A.R. (2003). *Pseudomonas aeruginosa* ExoU, a toxin  
1245 transported by the type III secretion system, kills *Saccharomyces cerevisiae*. *Infect.*  
1246 *Immun.* *71*, 4144–4150.
- 1247 Sachs, N., Papaspyropoulos, A., Zomer-van Ommen, D.D., Heo, I., Böttinger, L.,

- 1248 Klay, D., Weeber, F., Huelsz-Prince, G., Iakobachvili, N., Amatngalim, G.D., et al.  
1249 (2019). Long-term expanding human airway organoids for disease modeling. *EMBO*  
1250 *J.* **38**.
- 1251 Sadikot, R.T., Zeng, H., Azim, A.C., Joo, M., Dey, S.K., Beyer, R.M., Pebbles, R.S.,  
1252 Blackwell, T.S., and Christman, J.W. (2007). Bacterial clearance of *Pseudomonas*  
1253 *aeruginosa* is enhanced by the inhibition of COX-2. *Eur. J. Immunol.* **37**, 1001–1009.
- 1254 Saliba, A.M., Nascimento, D.O., Silva, M.C.A., Assis, M.C., Gayer, C.R.M.,  
1255 Raymond, B., Coelho, M.G.P., Marques, E.A., Touqui, L., Albano, R.M., et al. (2005).  
1256 Eicosanoid-mediated proinflammatory activity of *pseudomonas aeruginosa* ExoU.  
1257 *Cell. Microbiol.* **7**, 1811–1822.
- 1258 Saliba, A.M., De Assis, M.C., Nishi, R., Raymond, B., Marques, E.D.A., Lopes, U.G.,  
1259 Touqui, L., and Plotkowski, M.C. (2006). Implications of oxidative stress in the  
1260 cytotoxicity of *Pseudomonas aeruginosa* ExoU. *Microbes Infect.* **8**, 450–459.
- 1261 Santos, J.C., Dick, M.S., Lagrange, B., Degrandi, D., Pfeffer, K., Yamamoto, M.,  
1262 Meunier, E., Pelczar, P., Henry, T., and Broz, P. (2018). <scp>LPS</scp> targets  
1263 host guanylate-binding proteins to the bacterial outer membrane for non-canonical  
1264 inflammasome activation. *EMBO J.* **37**.
- 1265 Sato, H., and Frank, D.W. (2004). ExoU is a potent intracellular phospholipase. *Mol.*  
1266 *Microbiol.* **53**, 1279–1290.
- 1267 Sevanian, A., Wratten, M. Lou, McLeod, L.L., and Kim, E. (1988). Lipid peroxidation  
1268 and phospholipase A2 activity in liposomes composed of unsaturated phospholipids:  
1269 a structural basis for enzyme activation. *Biochim. Biophys. Acta (BBA)/Lipids Lipid*  
1270 *Metab.* **961**, 316–327.
- 1271 Shaver, C.M., and Hauser, A.R. (2004). Relative contributions of *Pseudomonas*  
1272 *aeruginosa* ExoU, ExoS, and ExoT to virulence in the lung. *Infect. Immun.* **72**, 6969–  
1273 6977.
- 1274 Sitkiewicz, I., Nagiec, M.J., Sumbly, P., Butler, S.D., Cywes-Bentley, C., and Musser,  
1275 J.M. (2006). Emergence of a bacterial clone with enhanced virulence by acquisition  
1276 of a phage encoding a secreted phospholipase A2. *Proc. Natl. Acad. Sci. U. S. A.*  
1277 **103**, 16009–16014.

- 1278 Sitkiewicz, I., Stockbauer, K.E., and Musser, J.M. (2007). Secreted bacterial  
1279 phospholipase A2 enzymes: better living through phospholipolysis. *Trends Microbiol.*  
1280 *15*, 63–69.
- 1281 Skouta, R., Dixon, S.J., Wang, J., Dunn, D.E., Orman, M., Shimada, K., Rosenberg,  
1282 P.A., Lo, D.C., Weinberg, J.M., Linkermann, A., et al. (2014). Ferrostatis inhibit  
1283 oxidative lipid damage and cell death in diverse disease models. *J. Am. Chem. Soc.*  
1284 *136*, 4551–4556.
- 1285 Stockwell, B.R., Jiang, X., and Gu, W. (2020). Emerging Mechanisms and Disease  
1286 Relevance of Ferroptosis.
- 1287 Sutterwala, F.S., Mijares, L.A., Li, L., Ogura, Y., Kazmierczak, B.I., and Flavell, R.A.  
1288 (2007). Immune recognition of *Pseudomonas aeruginosa* mediated by the  
1289 IPAF/NLRC4 inflammasome. *J. Exp. Med.* *204*, 3235–3245.
- 1290 Tamura, M., Ajayi, T., Allmond, L.R., Moriyama, K., Wiener-Kronish, J.P., and Sawa,  
1291 T. (2004). Lysophospholipase A activity of *Pseudomonas aeruginosa* type III  
1292 secretory toxin ExoU. *Biochem. Biophys. Res. Commun.* *316*, 323–331.
- 1293 Tang, L., Lu, C., Zheng, G., and Burgering, B.M.T. (2020). Emerging insights on the  
1294 role of gasdermins in infection and inflammatory diseases. *Clin. Transl. Immunol.* *9*.
- 1295 Troegeler, A., Lastrucci, C., Duval, C., Tanne, A., Cougoule, C., Maridonneau-Parini,  
1296 I., Neyrolles, O., and Lugo-Villarino, G. (2014). An efficient siRNA-mediated gene  
1297 silencing in primary human monocytes, dendritic cells and macrophages. *Immunol.*  
1298 *Cell Biol.* *92*, 699–708.
- 1299 Tyurin, V.A., Balasubramanian, K., Winnica, D., Tyurina, Y.Y., Vikulina, A.S., He,  
1300 R.R., Kapralov, A.A., Macphee, C.H., and Kagan, V.E. (2014). Oxidatively modified  
1301 phosphatidylserines on the surface of apoptotic cells are essential phagocytic “eat-  
1302 me” signals: Cleavage and inhibition of phagocytosis by Lp-PLA 2. *Cell Death Differ.*  
1303 *21*, 825–835.
- 1304 Tyurina, Y.Y., Tyurin, V.A., Anthony-muthu, T., Amoscato, A.A., Sparvero, L.J.,  
1305 Nesterova, A.M., Baynard, M.L., Sun, W., He, R.R., Khaitovich, P., et al. (2019).  
1306 “Redox lipidomics technology: Looking for a needle in a haystack.” *Chem. Phys.*  
1307 *Lipids* *221*, 93–107.

- 1308 Wiernicki, B., Dubois, H., Tyurina, Y.Y., Hassannia, B., Bayir, H., Kagan, V.E.,  
1309 Vandenabeele, P., Wullaert, A., and Vanden Berghe, T. (2020). Excessive  
1310 phospholipid peroxidation distinguishes ferroptosis from other cell death modes  
1311 including pyroptosis. *Cell Death Dis.* *11*, 922.
- 1312 Wilson, S.K., and Knoll, L.J. (2018). Patatin-like phospholipases in microbial  
1313 infections with emerging roles in fatty acid metabolism and immune regulation by  
1314 Apicomplexa. *Mol. Microbiol.* *107*, 34–46.
- 1315 Yan1, B., Ai1, Y., Zhang1, Z., Sun1, Q., Ma1, Y., Zhang1, Z., and Wang1, X. (2020).  
1316 Oxidoreductases generate hydrogen peroxide that drives iron-dependent lipid  
1317 peroxidation during ferroptosis 2 The inhibition of antioxidant systems of glutathione  
1318 peroxidase 4 (GPX4) or ferroptosis suppressor protein 1 (FSP1) causes iron-  
1319 dependent peroxid. *BioRxiv* 2020.08.01.231993.
- 1320 Yang, D., Han, Z., and Oppenheim, J.J. (2017). Alarmins and immunity. *Immunol.*  
1321 *Rev.* *280*, 41–56.
- 1322 Yang, W.S., Kim, K.J., Gaschler, M.M., Patel, M., Shchepinov, M.S., and Stockwell,  
1323 B.R. (2016). Peroxidation of polyunsaturated fatty acids by lipoxygenases drives  
1324 ferroptosis. *Proc. Natl. Acad. Sci. U. S. A.* *113*, E4966–E4975.
- 1325 Yedgar, S., Cohen, Y., and Shoseyov, D. (2006). Control of phospholipase A2  
1326 activities for the treatment of inflammatory conditions. *Biochim. Biophys. Acta - Mol.*  
1327 *Cell Biol. Lipids* *1761*, 1373–1382.
- 1328 Zhu, H., Santo, A., Jia, Z., and Li, Y. (2019). GPx4 in Bacterial Infection and  
1329 Polymicrobial Sepsis: Involvement of Ferroptosis and Pyroptosis. *React. Oxyg.*  
1330 *Species* *7*, 154.
- 1331 Zou, Y., Li, H., Graham, E.T., Deik, A.A., Eaton, J.K., Wang, W., Sandoval-Gomez,  
1332 G., Clish, C.B., Doench, J.G., and Schreiber, S.L. (2020). Cytochrome P450  
1333 oxidoreductase contributes to phospholipid peroxidation in ferroptosis. *Nat. Chem.*  
1334 *Biol.* *16*, 302–309.
- 1335
- 1336
- 1337

1338

1339

1340

1341

1342

1343

1344

1345

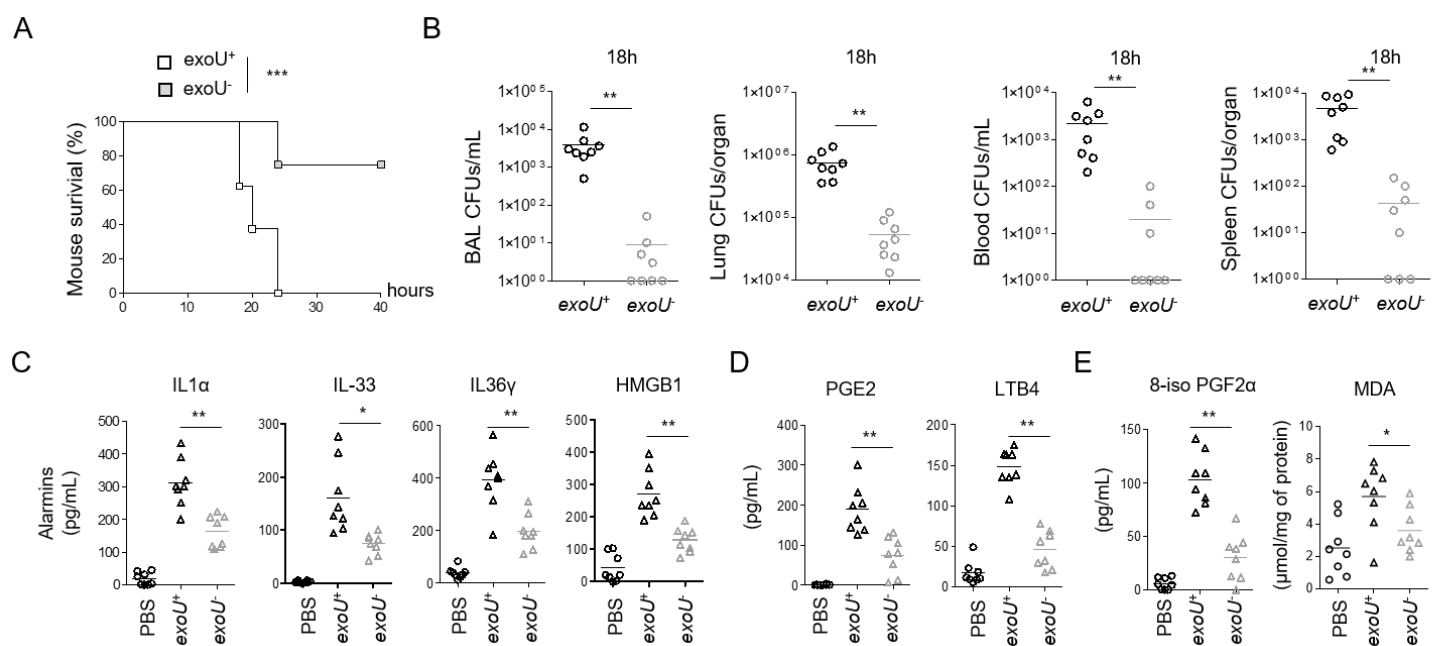



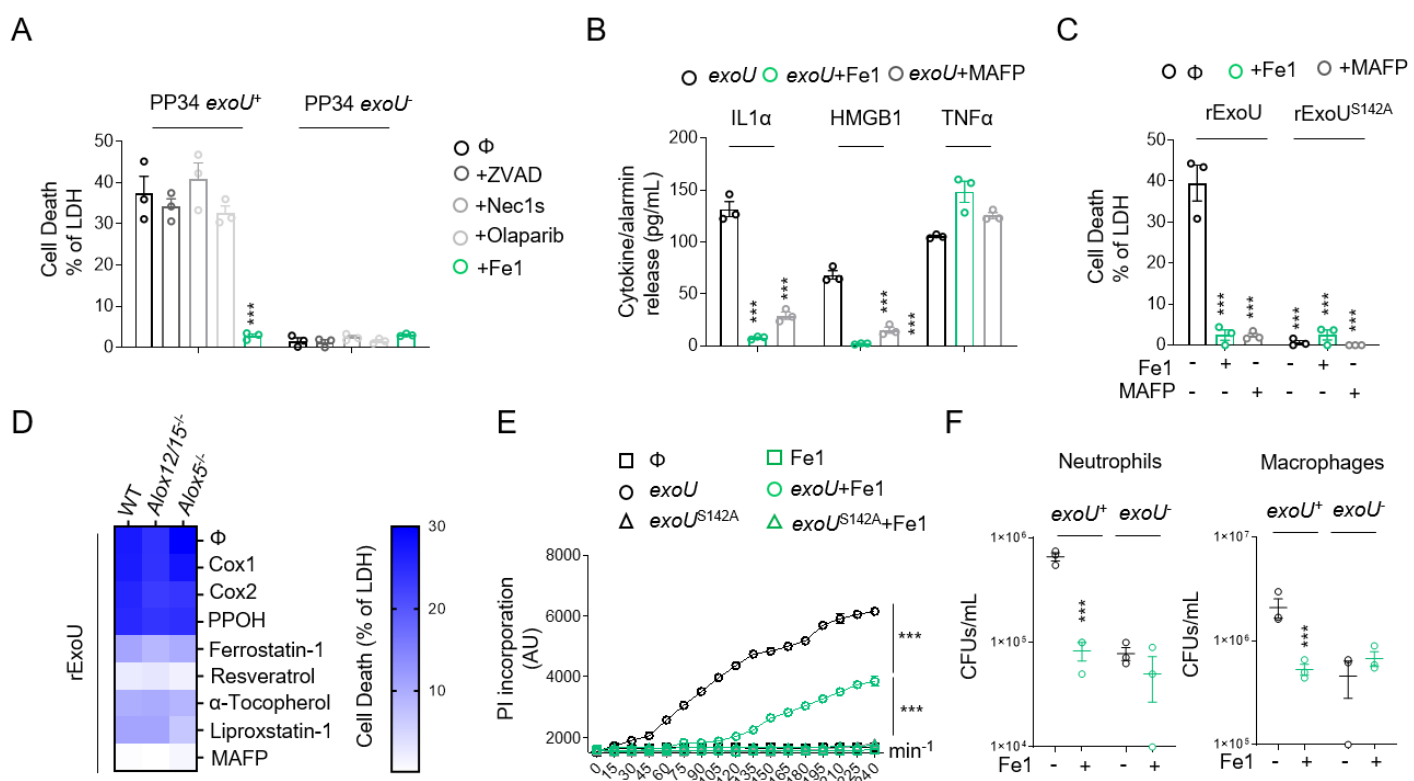

A

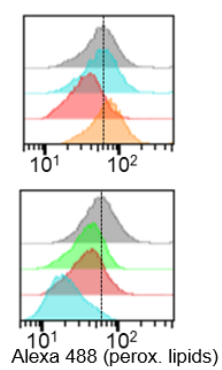

B

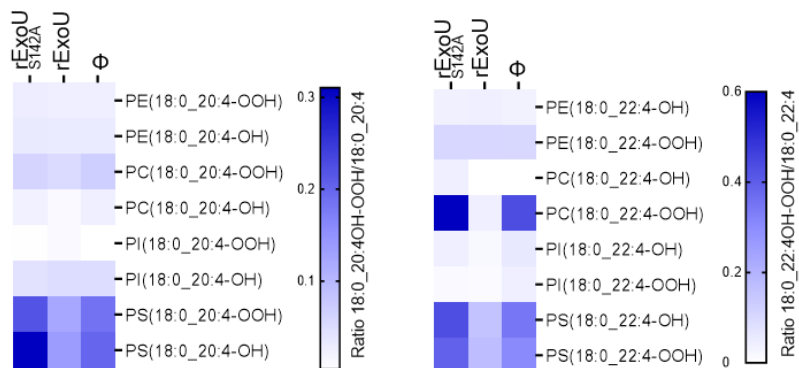

C

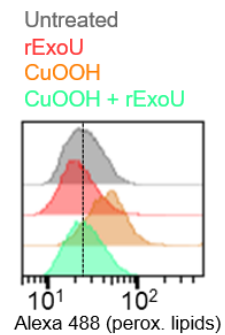

D

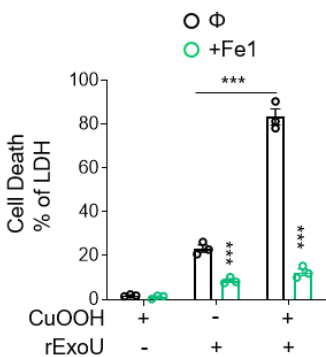

E

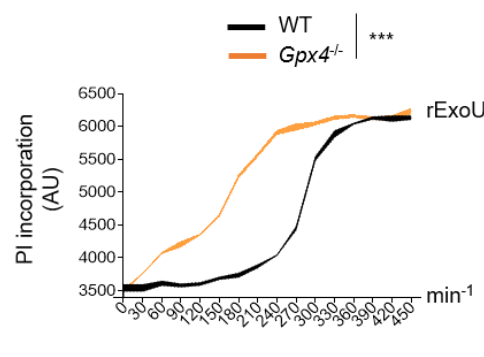

F

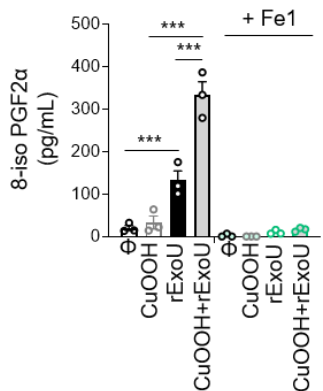

G

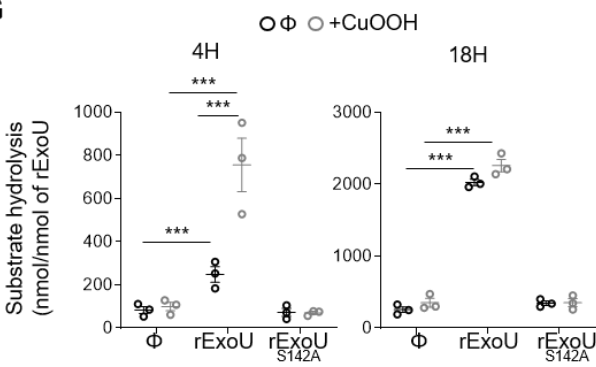

H

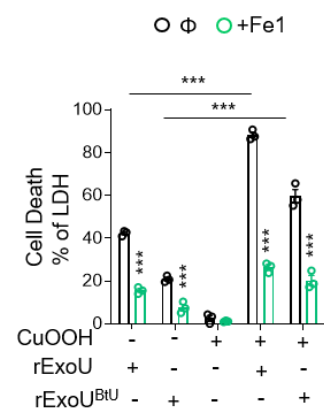

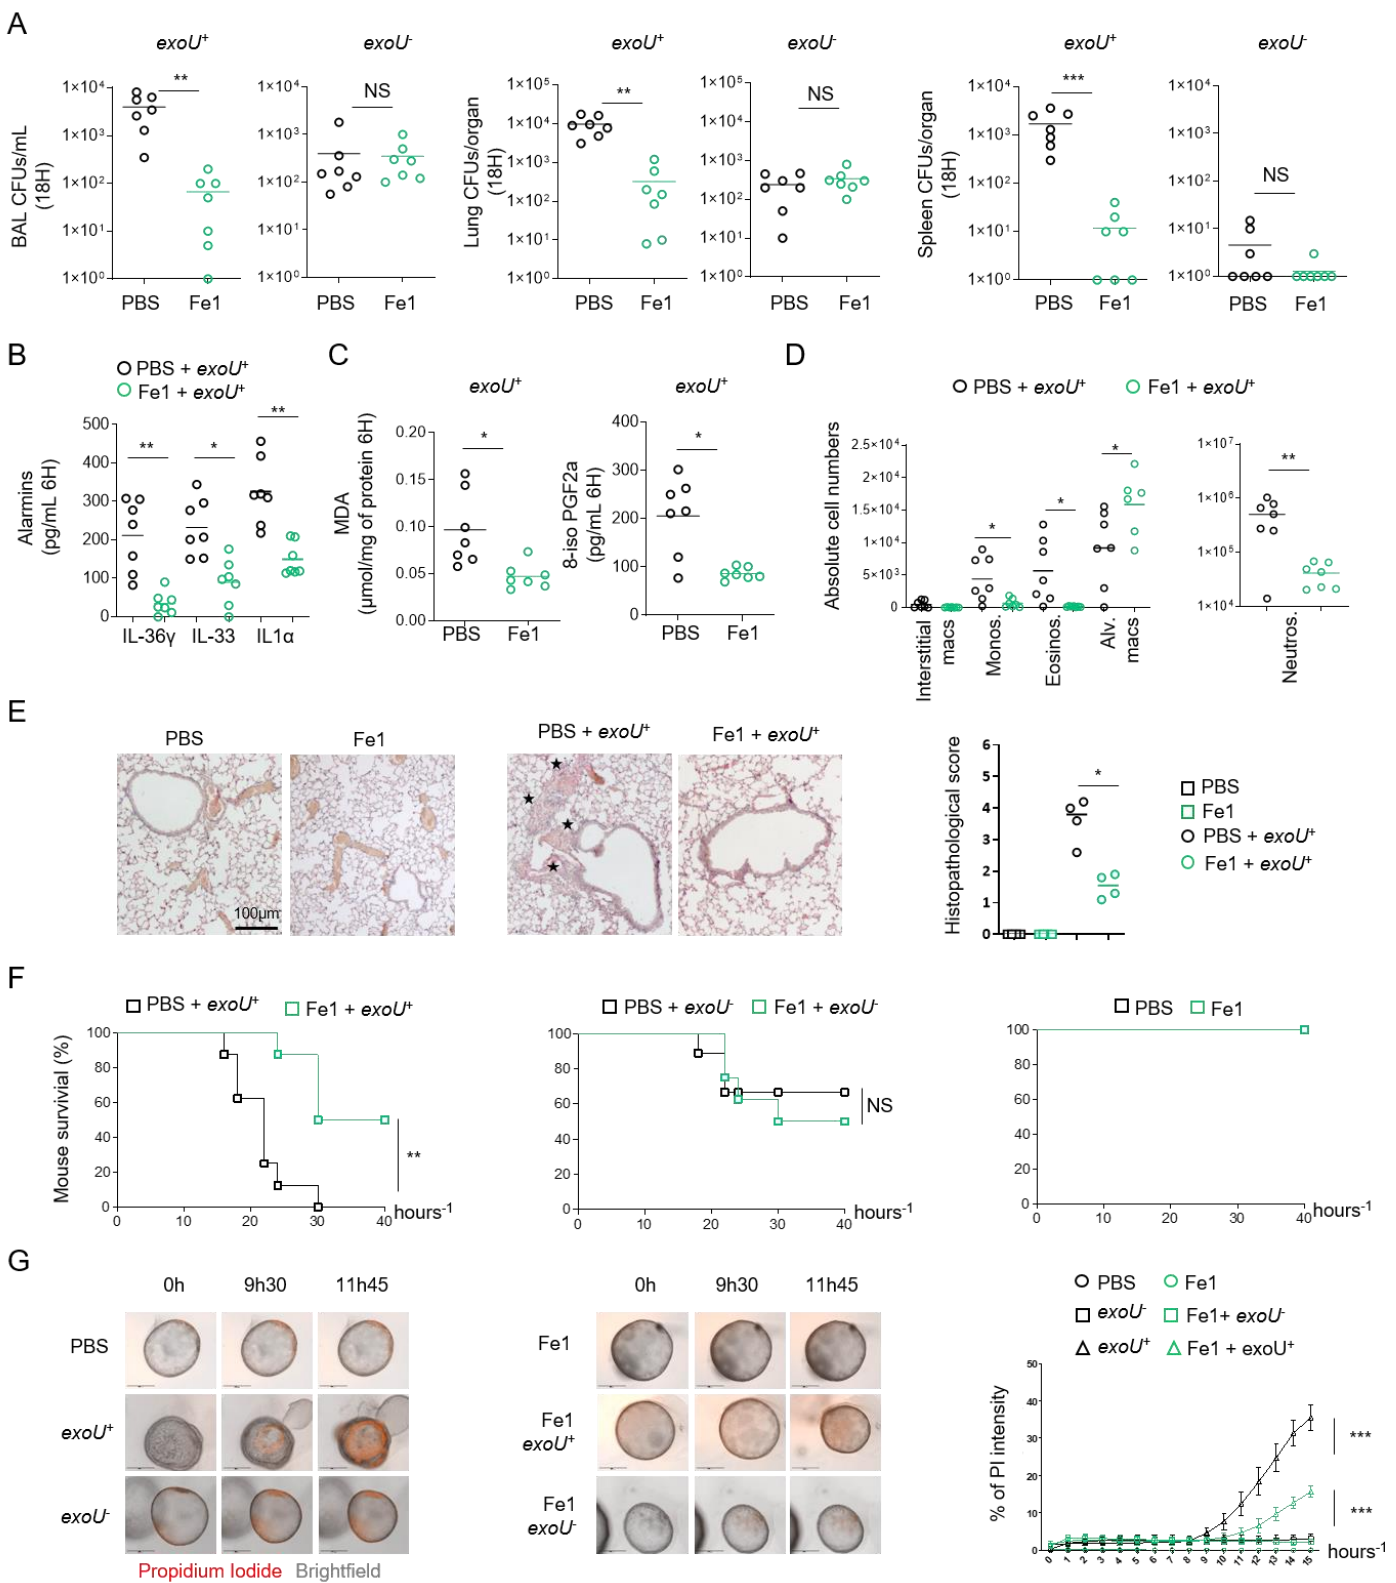

Source: https://biorxiv.org/content/10.1101/2021.02.17.431580v1.full.pdf
